# Supplementary material
Source: PubMed Central journal article supplement (PMC9019993)

Supplementary material to  
**Data-Driven Prediction of COVID-19 Cases in  
Germany for Decision Making**

Lukas Refisch, Fabian Lorenz, Torsten Riedlinger,  
Hannes Taubenböck, Martina Fischer, Linus Grabenhenrich,  
Martin Wolkewitz, Harald Binder and Clemens Kreutz

## Contents

|          |                                                         |           |
|----------|---------------------------------------------------------|-----------|
| <b>1</b> | <b>Modelling choices</b>                                | <b>2</b>  |
| <b>2</b> | <b>Weekday effect in data</b>                           | <b>3</b>  |
| <b>3</b> | <b>Correction Factor</b>                                | <b>4</b>  |
| <b>4</b> | <b>Model equations: SIR model with a spline input</b>   | <b>5</b>  |
| 4.1      | Dynamic variables . . . . .                             | 5         |
| 4.2      | Input variables . . . . .                               | 5         |
| 4.3      | Reactions . . . . .                                     | 6         |
| 4.4      | ODE system . . . . .                                    | 6         |
| 4.5      | Derived variables . . . . .                             | 7         |
| 4.6      | Conditions . . . . .                                    | 7         |
| 4.7      | Observables . . . . .                                   | 8         |
| <b>5</b> | <b>Comprehensive results for one region: Germany</b>    | <b>9</b>  |
| 5.1      | Model variables and trajectories . . . . .              | 9         |
| 5.2      | Fit to data . . . . .                                   | 10        |
| 5.3      | Parameter estimation and confidence intervals . . . . . | 11        |
| <b>6</b> | <b>Results for federal states</b>                       | <b>14</b> |
| 6.1      | Predictions for all federal states . . . . .            | 14        |
| 6.2      | Weekly factor . . . . .                                 | 23        |
| <b>7</b> | <b>Results for all regions and counties: Landkreise</b> | <b>24</b> |

# 1 Modelling choices

Table 1: Necessary considerations for dynamical modeling

For an ODE-model description of current Sars-Cov-2 pandemic at least the following points should be taken into account. This list is most probably not complete.

| Topic                     | What did we use                                          | Possible Alternative(s)                            | Reasoning                                                                                                                                      |
|---------------------------|----------------------------------------------------------|----------------------------------------------------|------------------------------------------------------------------------------------------------------------------------------------------------|
| Data source               | RKI "Meldedaten"                                         | JHU, ECDC, Zeit Online ...                         | official German agency for reporting infectious disease cases                                                                                  |
| Quantity to fit           | daily incidence                                          | cumulative data                                    | cumulative cases numbers are not independent of each other, so: uncertainty would be underestimated                                            |
| Time point zero           | day with >100 total cases                                | first day of reported infection                    | stochasticity at the beginning cannot be described with ODE approach.                                                                          |
| Age structure             | not taken into account                                   | fit age groups of RKI data set                     | Number of parameters grows at least quadratically, but amount of data linearly when adding age groups. Also, computation time becomes an issue |
| Vaccination               | not taken into account                                   | include info on vaccinations                       | For constant vaccination rate, $\beta(t)$ incorporates vaccination effect. No information on county level available.                           |
| Reporting delay           | ignoring latest two days OR adjusting by historical data | ignoring it altogether                             | latest data points affect prediction, hence important.                                                                                         |
| Infection rate $\beta(t)$ | cubic spline with 15 d.o.f                               | piecewise constant function between different NPIs | many unknown effects altering infection rate                                                                                                   |
| Weekly oscillation        | is accounted for                                         | assuming no weekly data artifact                   | latest data points affect prediction, hence important.                                                                                         |
| Mutations                 | not taken into account                                   | use additional sequencing data for fitting model   | no comprehensive data on mutations available for Germany                                                                                       |

## 2 Weekday effect in data

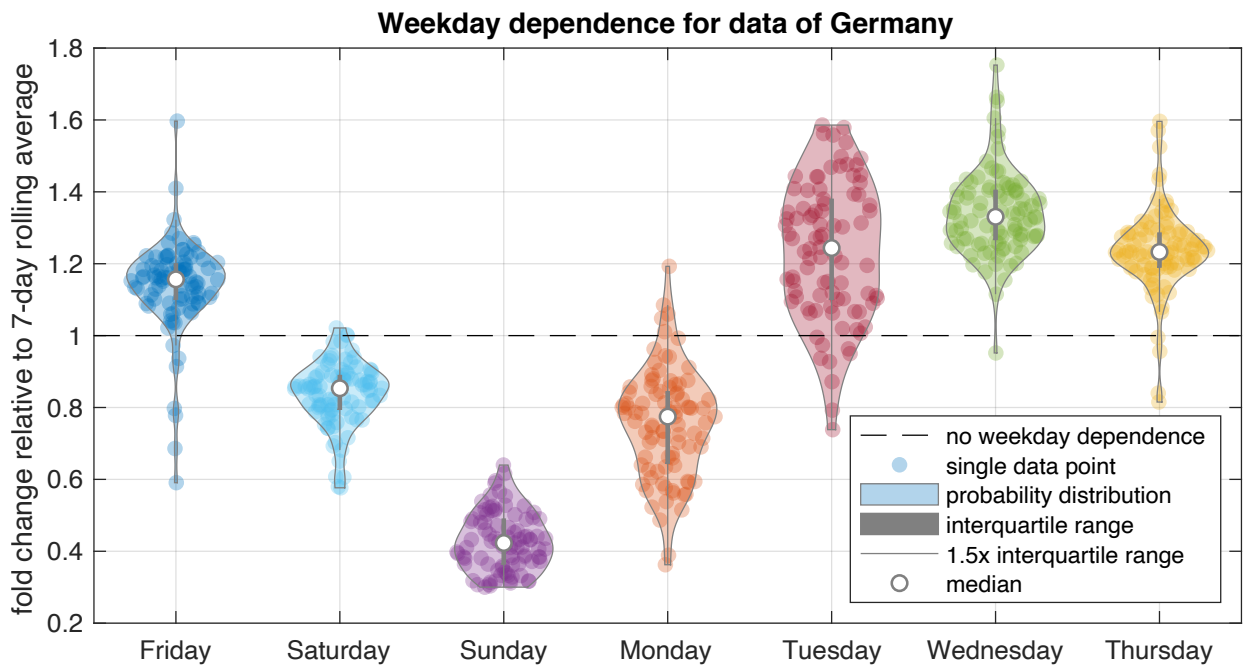

Figure 1: **Weekday has effect on reporting probability**

In the data, there is a clear dependence on the weekday. Plotted is the distribution of the fraction (or fold change) of the daily value and the 7-day-rolling average for that day per weekday. If there was no dependence on the weekday in the data, then these fractions should fluctuate around the value of one (dashed black line).

Note, that all quantity in this figure were computed based on the published incidence data - no ODE modeling has been performed for this. The time course from March 2020 through 1st December 2021 was analyzed for this particular figure.

### 3 Correction Factor

Table 2: **Summary statistics of correction factor**

For every federal state and Germany we calculated correction factors. The correction factor accounts for delayed reporting and is calculated from historic data sets. Here, we display summary statistics depending on number of days that have passed for the day that shall be corrected. Ideally, this value is 1 which corresponds to no correction at all.

The table can be read as follows: In the latest data set, the number of incident cases that has been reported for the day before yesterday (delay of two days) needs - on average - to be multiplied by a factor of 1.26 (or increased by 26%). For individual federal states this number might differ. A measure of how much it varies across regions is the standard deviation given in column 3.

| delay in days | mean ( $CF$ ) | standard deviation ( $CF$ ) |
|---------------|---------------|-----------------------------|
| 1             | 2.13          | 0.70                        |
| 2             | 1.26          | 0.28                        |
| 3             | 1.12          | 0.09                        |
| 4             | 1.09          | 0.05                        |
| 5             | 1.09          | 0.04                        |
| 6             | 1.08          | 0.03                        |
| 7             | 1.06          | 0.02                        |
| 8             | 1.05          | 0.02                        |
| 9             | 1.04          | 0.02                        |
| 10            | 1.04          | 0.02                        |
| ...           | ...           | ...                         |

## 4 Model equations: SIR model with a spline input

We present here the full list of equations of the model used for fitting time course data of federal states and Germany.

### 4.1 Dynamic variables

The model contains 4 dynamic variables. The dynamics of those variables evolve according to a system of ordinary differential equations (ODE) as will be defined in the following. The following list indicates the unique variable names and their initial conditions.

- **Dynamic variable 1:** Susceptibles

$$[\text{Susceptibles}](t = 0) = \text{init\_Susceptibles}$$

- **Dynamic variable 2:** Exposed

$$[\text{Exposed}](t = 0) = \text{init\_Exposed}$$

- **Dynamic variable 3:** Infectious

$$[\text{Infectious}](t = 0) = \text{init\_Infectious}$$

- **Dynamic variable 4:** Removed

$$[\text{Removed}](t = 0) = 0$$

### 4.2 Input variables

The model contains 3 external inputs variables. Those variables evolve according to a regular algebraic equation. They are calculated before the ODE systems is solved and can appear in reaction rate equations. The following list indicates the unique variable names and their corresponding equations.

- **Input variable 1:** InputSpline

$$[\text{InputSpline}](t) = \text{spline\_15} \left( t, 0, 5, \frac{1}{13} \cdot t_{\text{Last}}, \text{spValue2}, \frac{2}{13} \cdot t_{\text{Last}}, \text{spValue3}, \frac{3}{13} \cdot t_{\text{Last}}, \text{spValue4}, \frac{4}{13} \cdot t_{\text{Last}}, \text{spValue5}, \frac{5}{13} \cdot t_{\text{Last}}, \text{spValue6}, \frac{6}{13} \cdot t_{\text{Last}}, \text{spValue7}, \frac{7}{13} \cdot t_{\text{Last}}, \text{spValue8}, \frac{8}{13} \cdot t_{\text{Last}}, \text{spValue9}, \frac{9}{13} \cdot t_{\text{Last}}, \text{spValue10}, \frac{10}{13} \cdot t_{\text{Last}}, \text{spValue11}, \frac{11}{13} \cdot t_{\text{Last}}, \text{spValue12}, \frac{12}{13} \cdot t_{\text{Last}}, \text{spValue13}, t_{\text{Last}} + 50, \text{spValue14}, t_{\text{Last}} + 300, 5, 0, 0 \right)$$

which is the notation of the modelling tool for a spline with 13 fitted values on an equally spaced time axis fixed future nodes. See [here](#) for documentation of input splines.

- **Input variable 2:** InputSplineEnd

$$[\text{InputSplineEnd}](t) = [\text{InputSpline}](t = t_{\text{Last}})$$

- **Input variable 3:** fixSpline

$$[\text{fixSpline}](t) = \text{step\_1}(t, 0, t_{\text{Last}}, 1)$$

### 4.3 Reactions

The model contains 3 reactions. Reactions define interactions between dynamics variables and build up the ODE systems. The following list indicates the reaction laws and their corresponding reaction rate equations. In the reaction rate equations dynamic and input variables are indicated by square brackets. The remaining variables are model parameters that remain constant over time.

- **Reaction 1:**

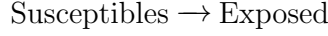

$$v_1 = - \frac{[\text{Infectious}] \cdot [\text{Susceptibles}] \cdot b \cdot \left( \frac{[\text{fixSpline}] - 1}{e^{-[\text{inputSpline}] + 1}} - \frac{[\text{fixSpline}]}{e^{-[\text{inputSplineEnd}] + 1}} \right)}{[\text{Exposed}] + [\text{Infectious}] + [\text{Removed}] + [\text{Susceptibles}]}$$

- **Reaction 2:**

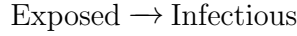

$$v_2 = [\text{Exposed}] \cdot \text{rate\_infectious}$$

- **Reaction 3:**

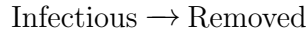

$$v_3 = [\text{Infectious}] \cdot \text{rate\_removal}$$

### 4.4 ODE system

The specified reaction laws and rate equations  $v$  determine an ODE system. The time evolution of the dynamical variables is calculated by solving this equation system.

$$\begin{aligned} d[\text{Susceptibles}]/dt &= -v_1 \\ d[\text{Exposed}]/dt &= +v_1 - v_2 \\ d[\text{Infectious}]/dt &= +v_2 - v_3 \\ d[\text{Removed}]/dt &= +v_3 \end{aligned}$$

Substituting the reaction rates  $v_i$  yields:

$$d[\text{Susceptibles}]/dt = - \frac{[\text{Infectious}] \cdot [\text{Susceptibles}] \cdot b \cdot [\text{b\_time\_dependence}]}{[\text{Total\_population}]}$$

$$d[\text{Exposed}]/dt = \frac{[\text{Infectious}] \cdot [\text{Susceptibles}] \cdot b \cdot [\text{b\_time\_dependence}]}{[\text{Total\_population}]} - [\text{Exposed}] \cdot \text{rate\_infectious}$$

$$d[\text{Infectious}]/dt = [\text{Exposed}] \cdot \text{rate\_infectious} - [\text{Infectious}] \cdot \text{rate\_removal}$$

$$d[\text{Removed}]/dt = [\text{Infectious}] \cdot \text{rate\_removal}$$

The ODE system was solved by a parallelized implementation of the CVODES algorithm. It also supplies the parameter sensitivities utilized for parameter estimation.

## 4.5 Derived variables

The model contains 6 derived variables. Derived variables are calculated after the ODE system was solved. Dynamic and input variables are indicated by square brackets. The remaining variables are model parameters that remain constant over time.

- **Derived variable 1:** `b_time_dependence`

$$[b\_time\_dependence](t) = \frac{[fixSpline]}{e^{-[InputSplineEnd]} + 1} - \frac{[fixSpline] - 1}{e^{-[InputSpline]} + 1}$$

- **Derived variable 2:** `Total_confirmed`

$$[Total\_confirmed](t) = [Infectious] + [Removed]$$

- **Derived variable 3:** `Total_population`

$$[Total\_population](t) = [Exposed] + [Infectious] + [Removed] + [Susceptibles]$$

- **Derived variable 4:** `R_zero_t`

$$[R\_zero\_t](t) = -\frac{b \cdot \left( \frac{[fixSpline]-1}{e^{-[InputSpline]}+1} - \frac{[fixSpline]}{e^{-[InputSplineEnd]}+1} \right)}{rate\_removal}$$

- **Derived variable 5:** `R_t`

$$[R\_t](t) = -\frac{[Susceptibles] \cdot b \cdot \left( \frac{[fixSpline]-1}{e^{-[InputSpline]}+1} - \frac{[fixSpline]}{e^{-[InputSplineEnd]}+1} \right)}{rate\_removal \cdot ([Exposed] + [Infectious] + [Removed] + [Susceptibles])}$$

- **Derived variable 6:** `Total_confirmed_flux`

$$[Total\_confirmed\_flux](t) = [Exposed] \cdot rate\_infectious$$

## 4.6 Conditions

Conditions modify the model according to replacement rules. New model parameters can be introduced or relations between existing model parameters can be implemented. The following list are default conditions that can be replace my experiment specific conditions defined separately for each data set.

$$\begin{aligned} b &\rightarrow R\_null \cdot rate\_removal \\ init\_Exposed &\rightarrow \frac{init\_Infectious \cdot rate\_removal}{rate\_infectious} \\ init\_Exposed &\rightarrow \frac{init\_Infectious\_Germany \cdot rate\_removal}{rate\_infectious} \\ init\_Infectious &\rightarrow init\_Infectious\_Germany \\ init\_Susceptibles &\rightarrow 83186719 \end{aligned}$$

The value of `init_Susceptibles` is the number of inhabitants of Germany and will obviously differ dependent on the fitted federal state.

## 4.7 Observables

The following observable and its error function are added to fit the data. The weekday modulation factor  $\lambda_D$  is described in the main paper.

- **Observable:** Germany\_confirmed\_flux

$$\begin{aligned} \text{Germany\_confirmed\_flux}(t) &= [\text{Total\_confirmed\_flux}] \cdot \text{scaleCon} \cdot \lambda_D \\ \sigma\{\text{Germany\_confirmed\_flux}\}(t) &= \text{sigma} \cdot \sqrt{[\text{Total\_confirmed\_flux}] \cdot \text{scaleCon} + 1} \end{aligned}$$

Note, that for scaling down the dynamics from federal state level to county level, the error function is adjusted by equation (13) of the main manuscript.



## 5 Comprehensive results for one region: Germany

### 5.1 Model variables and trajectories

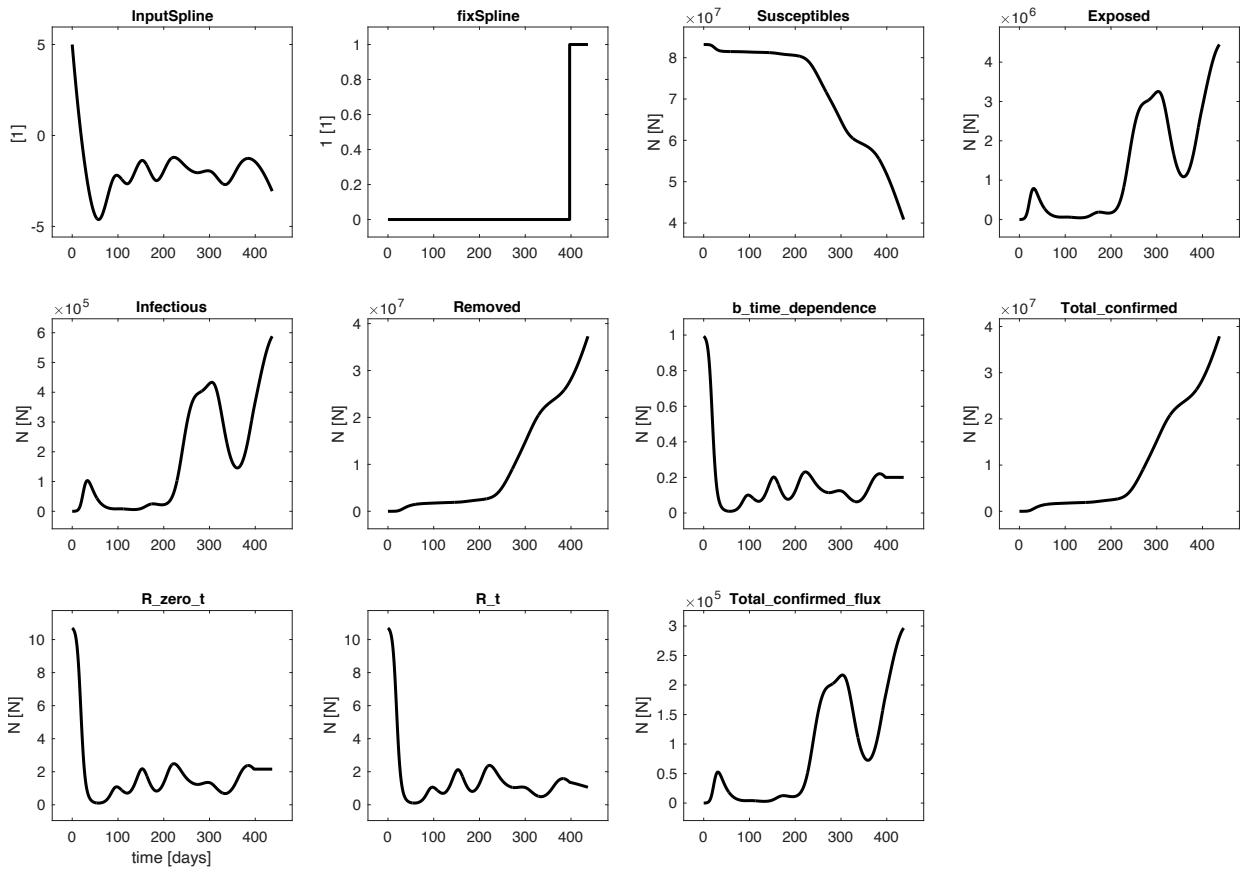

Figure 2: **Time courses of states and derived quantities**

All states and derived variables from the above model definition are plotted here. Over time, the **Susceptibles** get move through **Exposed** and **Infectious** states to reach the **Removed** state. The **InputSpline** is transformed to a factor function (**b\_time\_dependence**) and is fixed at time of the last data point by a Heaviside function ( $1-\text{fixSpline}$ ), as can be seen by the first two panels. The difference between **R\_zero\_t** and **R\_t** is whether or not they factor in the depletion of **Susceptibles** or not. The **Total\_confirmed\_flux** variable it the one eventually entering the observation function and is therefore used for calibrating the system.

## 5.2 Fit to data

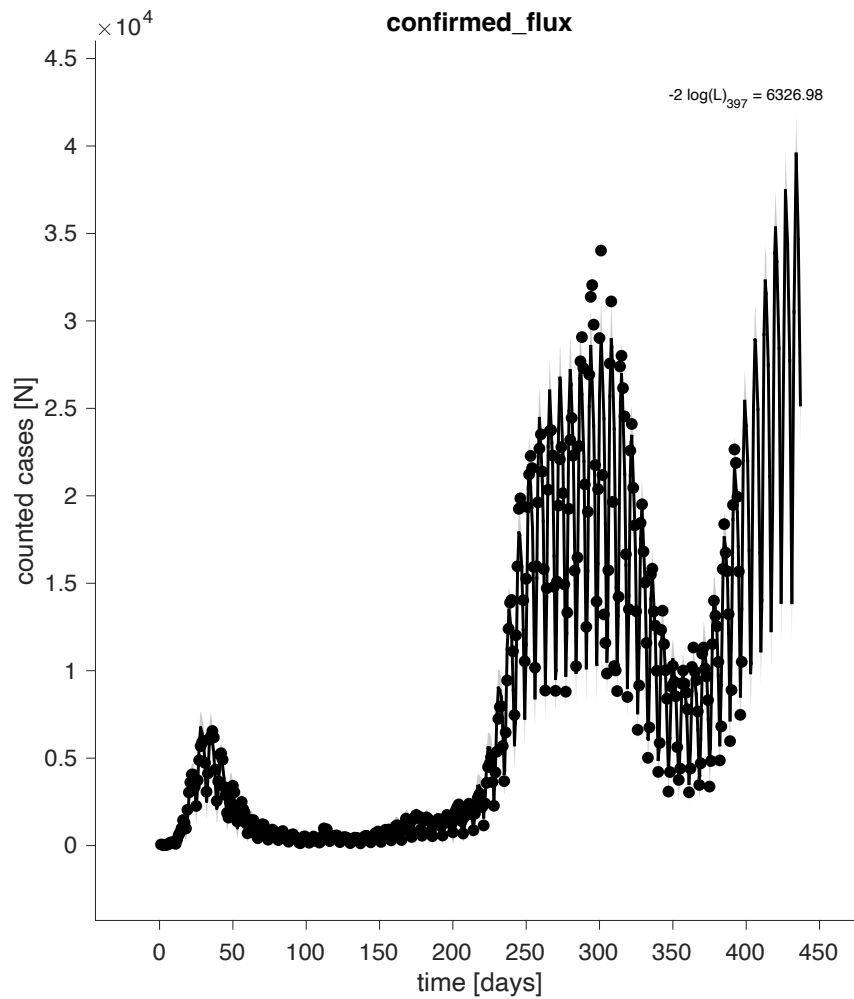

Figure 3: **Fitted incidence data**

The daily data (black dots) from Robert-Koch-Institut about reported positive cases of Covid-19 is fitted (black line) by the observation function of the dynamic model given in section 4.7. Time point zero is the first day where a total of 100 confirmed cases has been reached. The displayed shadow visualizes the measurement noise that is estimated based on Poisson error model.

### 5.3 Parameter estimation and confidence intervals

In total 19 parameters are estimated from the experimental data. The best fit yields a value of the objective function  $-2 \log(L) = 6326.98$  for a total of 397 data points. The model parameters were estimated by maximum likelihood estimation. In Table 3 the estimated parameter values are given. In Table 4, 95% confidence intervals for the estimated parameter values derived by the profile likelihood method as shown in figure 4 are given.

|    | name                    | $\theta_{min}$ | $\hat{\theta}$ | $\theta_{max}$ | log | non-log $\hat{\theta}$ | estimated |
|----|-------------------------|----------------|----------------|----------------|-----|------------------------|-----------|
| 1  | AA_0                    | -3             | +0.0000        | +5             | 1   | $+1.00 \cdot 10^{+00}$ | 0         |
| 2  | AA_1                    | -5             | -0.0775        | +3             | 1   | $+8.37 \cdot 10^{-01}$ | 1         |
| 3  | AA_2                    | -5             | -0.6235        | +3             | 1   | $+2.38 \cdot 10^{-01}$ | 1         |
| 4  | AA_3                    | -5             | -1.2943        | +3             | 1   | $+5.08 \cdot 10^{-02}$ | 1         |
| 5  | R_null                  | +0.1           | +1.0321        | +1             | 1   | $+1.08 \cdot 10^{+01}$ | 1         |
| 6  | init_Infectious_Germany | +0             | +1.9500        | +4             | 1   | $+8.91 \cdot 10^{+01}$ | 1         |
| 7  | phi_1                   | -6             | +0.4263        | +1e+01         | 0   | $+4.26 \cdot 10^{-01}$ | 1         |
| 8  | phi_2                   | -6             | +4.5821        | +1e+01         | 0   | $+4.58 \cdot 10^{+00}$ | 1         |
| 9  | phi_3                   | -6             | +1.3386        | +1e+01         | 0   | $+1.34 \cdot 10^{+00}$ | 1         |
| 10 | rate_infectious         | -1             | -1.1761        | +0             | 1   | $+6.67 \cdot 10^{-02}$ | 1         |
| 11 | rate_removal            | -1             | -0.3010        | -0.3           | 1   | $+5.00 \cdot 10^{-01}$ | 1         |
| 12 | scaleCon                | -1             | -1.0000        | +0             | 1   | $+1.00 \cdot 10^{-01}$ | 1         |
| 13 | sigma                   | -1             | +1.1220        | +1             | 1   | $+1.32 \cdot 10^{+01}$ | 1         |
| 14 | spValue10               | -5             | -2.0460        | +5             | 0   | $-2.05 \cdot 10^{+00}$ | 1         |
| 15 | spValue11               | -5             | -2.0144        | +5             | 0   | $-2.01 \cdot 10^{+00}$ | 1         |
| 16 | spValue12               | -5             | -2.6938        | +5             | 0   | $-2.69 \cdot 10^{+00}$ | 1         |
| 17 | spValue13               | -5             | -1.5725        | +5             | 0   | $-1.57 \cdot 10^{+00}$ | 1         |
| 18 | spValue14               | -5             | -3.6622        | +5             | 0   | $-3.66 \cdot 10^{+00}$ | 1         |
| 19 | spValue2                | -5             | -2.1203        | +5             | 0   | $-2.12 \cdot 10^{+00}$ | 0         |
| 20 | spValue3                | -5             | -4.5711        | +5             | 0   | $-4.57 \cdot 10^{+00}$ | 0         |
| 21 | spValue4                | -5             | -2.2842        | +5             | 0   | $-2.28 \cdot 10^{+00}$ | 0         |
| 22 | spValue5                | -5             | -2.6422        | +5             | 0   | $-2.64 \cdot 10^{+00}$ | 0         |
| 23 | spValue6                | -5             | -1.3728        | +5             | 0   | $-1.37 \cdot 10^{+00}$ | 0         |
| 24 | spValue7                | -5             | -2.4758        | +5             | 0   | $-2.48 \cdot 10^{+00}$ | 0         |
| 25 | spValue8                | -5             | -1.3232        | +5             | 0   | $-1.32 \cdot 10^{+00}$ | 1         |
| 26 | spValue9                | -5             | -1.6074        | +5             | 0   | $-1.61 \cdot 10^{+00}$ | 1         |
| 27 | tLast                   | +1             | +397.0000      | +4e+02         | 0   | $+3.97 \cdot 10^{+02}$ | 0         |

Table 3: **Estimated parameter values**

$\hat{\theta}$  indicates the estimated value of the parameters.  $\theta_{min}$  and  $\theta_{max}$  indicate the upper and lower bounds for the parameters. The log-column indicates if the value of a parameter was log-transformed. If  $\log \equiv 1$  the non-log-column indicates the non-logarithmic value of the estimate. The estimated-column indicates if the parameter value was estimated (1), or was fixed (0).

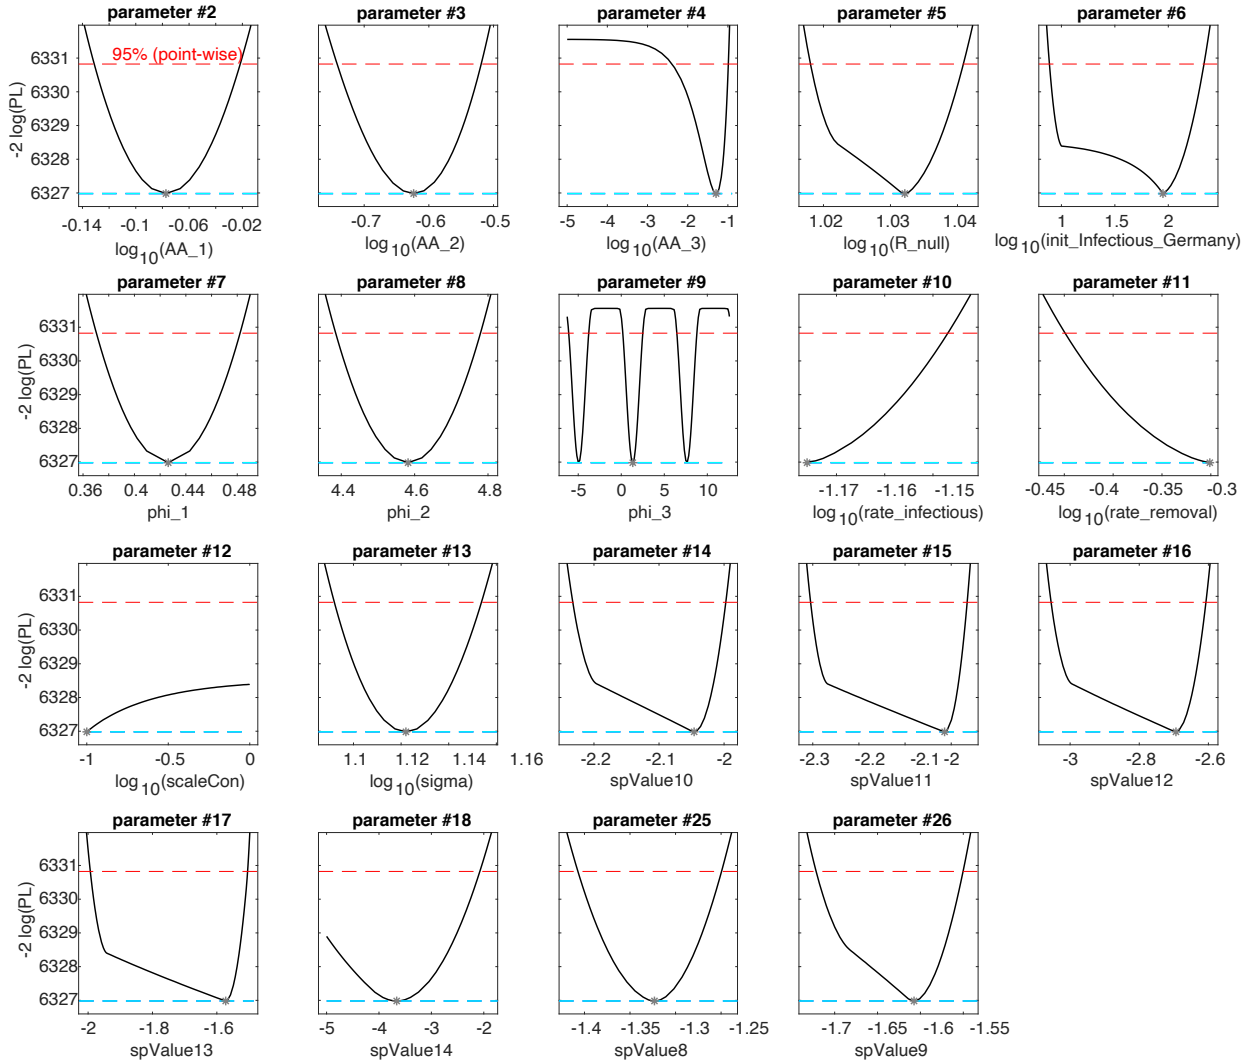

Figure 4: **Parameter profiles**

Uncertainty in predictions is determined by uncertainty in estimated parameters which can be calculated by profile likelihood analysis. Parameters  $AA_N$  and  $\phi_N$  ( $N = 1,2,3$ ) determine the modulation factor per weekday (see figure 21 of the supplement). Spline Parameters  $spValueN$  ( $N = 8,\dots,14$ ) resemble those spline parameters that will affect uncertainty in predictions. The first spline parameters will only affect the fit of the early time course, and not the predictions. Confidence intervals are determined by the profile intersecting the threshold, see table 4.

|    | name                    | $\hat{\theta}$ | $\sigma^-$ | $\sigma^+$ |
|----|-------------------------|----------------|------------|------------|
| 2  | AA_1                    | -0.077         | -0.131     | -0.022     |
| 3  | AA_2                    | -0.624         | -0.742     | -0.519     |
| 4  | AA_3                    | -1.294         | -2.396     | -0.989     |
| 5  | R_null                  | +1.032         | +1.018     | +1.041     |
| 6  | init_Infectious_Germany | +1.950         | +0.888     | +2.334     |
| 7  | phi_1                   | +0.426         | +0.370     | +0.482     |
| 8  | phi_2                   | +4.582         | +4.385     | +4.779     |
| 9  | phi_3                   | +1.339         | -6.106     | +8.787     |
| 10 | rate_infectious         | -1.176         | -Inf       | -1.147     |
| 11 | rate_removal            | -0.301         | -0.449     | +Inf       |
| 12 | scaleCon                | -1.000         | -Inf       | +Inf       |
| 13 | sigma                   | +1.122         | +1.092     | +1.154     |
| 14 | spValue10               | -2.046         | -2.233     | -1.997     |
| 15 | spValue11               | -2.014         | -2.305     | -1.965     |
| 16 | spValue12               | -2.694         | -3.055     | -2.607     |
| 17 | spValue13               | -1.572         | -1.993     | -1.504     |
| 18 | spValue14               | -3.662         | -Inf       | -2.075     |
| 25 | spValue8                | -1.323         | -1.407     | -1.249     |
| 26 | spValue9                | -1.607         | -1.722     | -1.550     |

Table 4: **Confidence intervals for the estimated parameter values derived by the profile likelihood**

$\hat{\theta}$  indicates the estimated optimal parameter value.  $\sigma^-$  and  $\sigma^+$  indicate 95% point-wise confidence intervals. A value of  $\pm\text{Inf}$  are displayed if the bound of parameter estimation is hit by the profile likelihood algorithm. See figure 4 of the supplement for the corresponding profiles.

## 6 Results for federal states

### 6.1 Predictions for all federal states

Analogous to figure 2 of the main paper, we present here the independent results for all 16 federal states. Note the different scales of estimated effective  $R(t)$  which might point to a degree of freedom that is not incorporated in the data. Further investigation about this model feature might be required. The caption of the figure is repeated here:

The incidence data of the entire time course is fitted (panel a) to estimate all dynamic parameters including the time-dependent infection rate that corresponds to  $R(t)$ (panel d). Predictions of incidences (panels b and c) and derived quantities (panels e and f) for a zoomed in time span are shown. 95%-confidence intervals (color-shaded areas) are inferred by profile likelihood calculation.

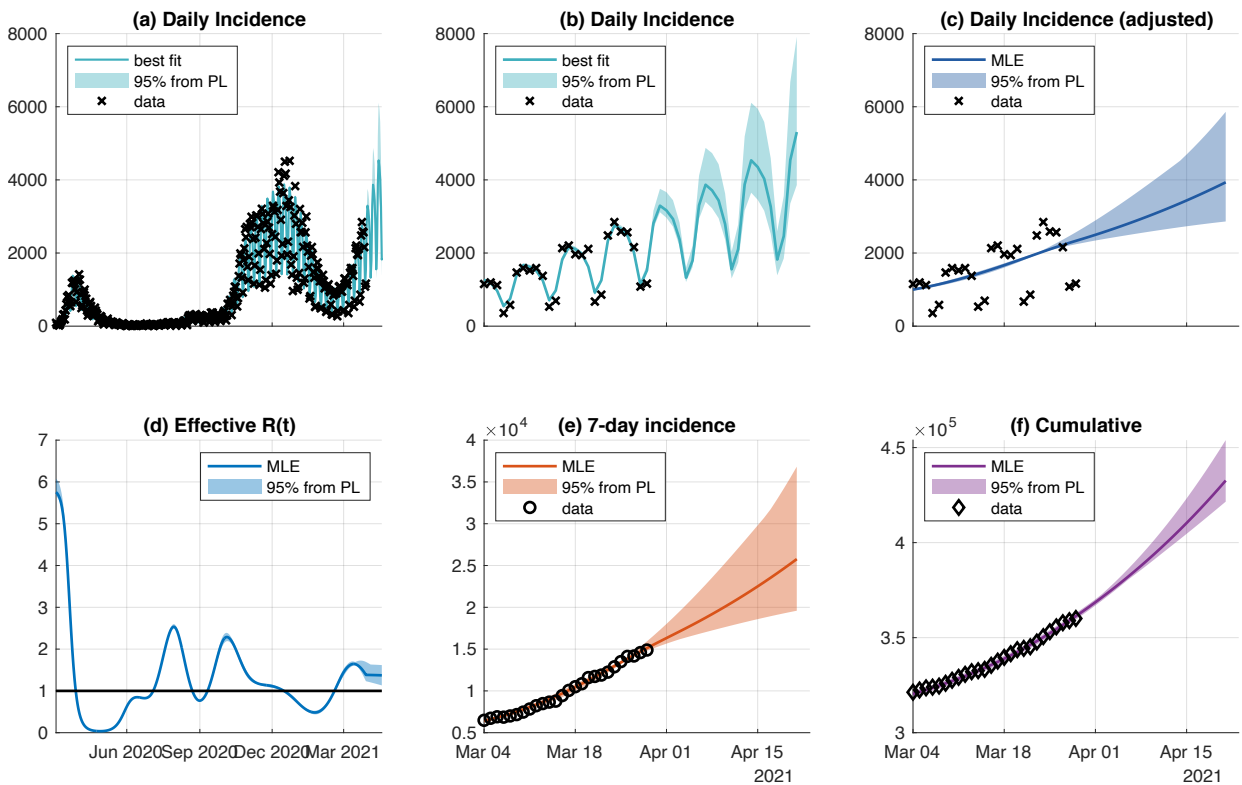

Figure 5: **Result for Baden-Wuerttemberg**

Corresponding result to figure 2 of the main paper. See page 14 for detailed description.

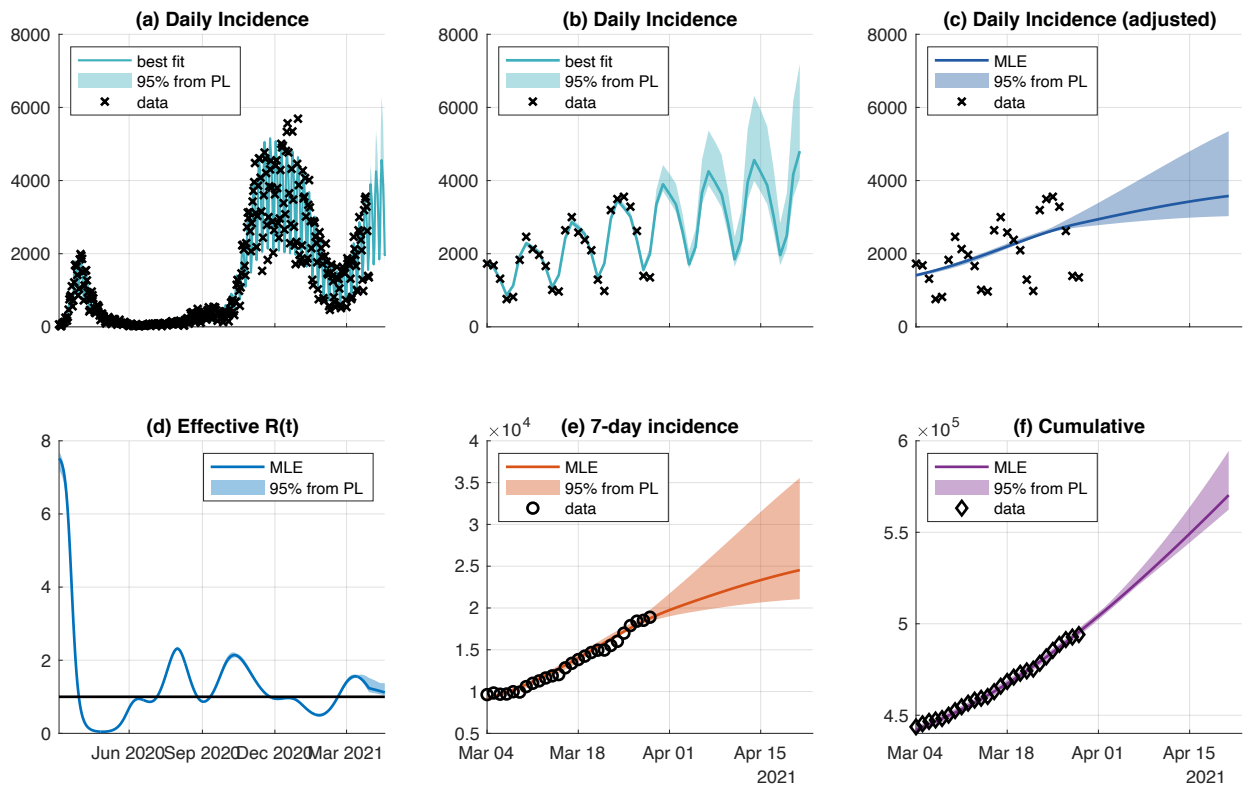

Figure 6: **Result for Bayern**

Corresponding result to figure 2 of the main paper. See page 14 for detailed description.

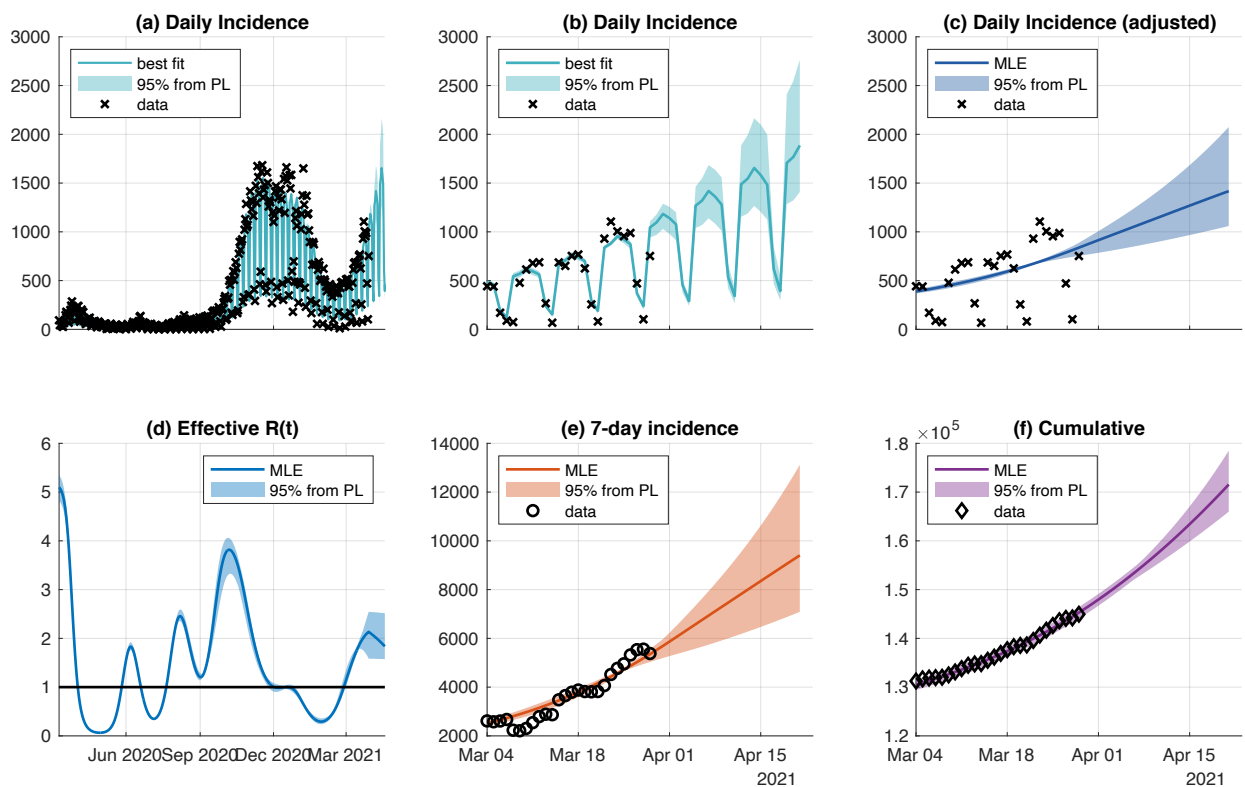

Figure 7: **Result for Berlin**

Corresponding result to figure 2 of the main paper. See page 14 for detailed description.

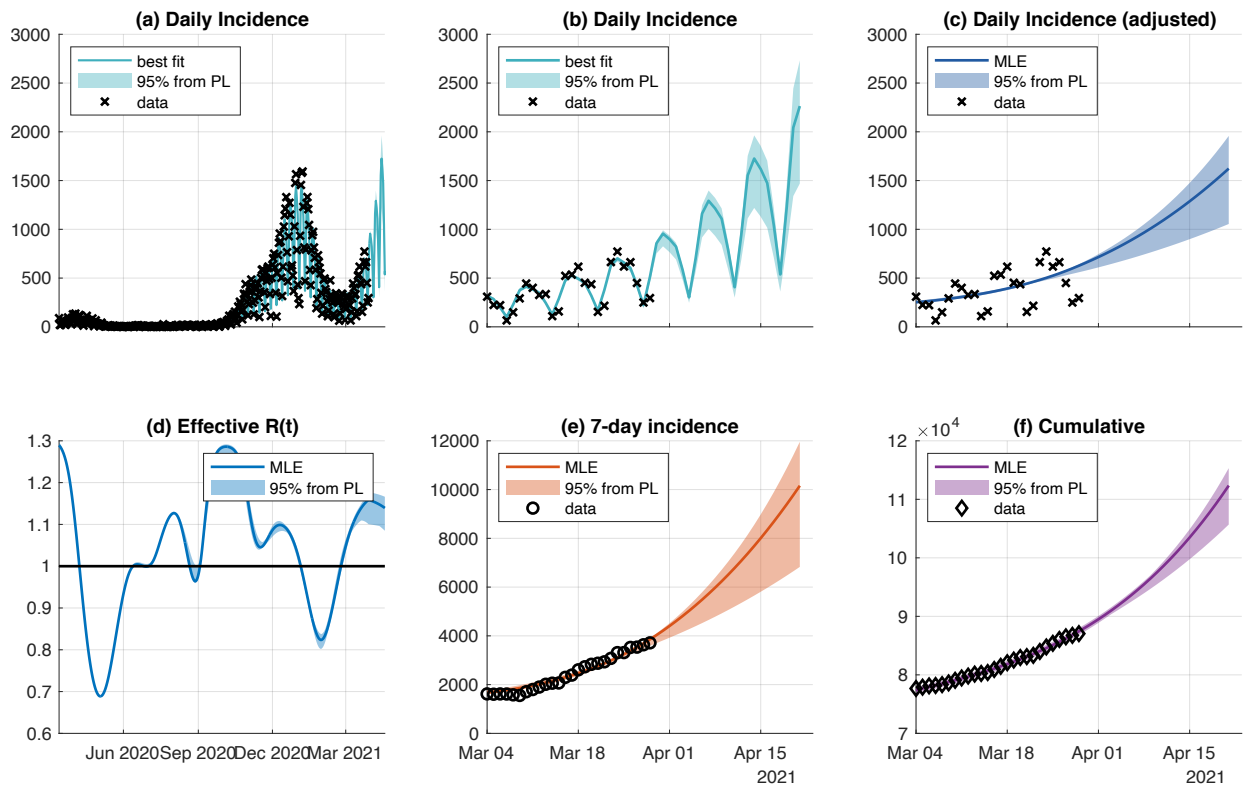

Figure 8: **Result for Brandenburg**

Corresponding result to figure 2 of the main paper. See page 14 for detailed description.

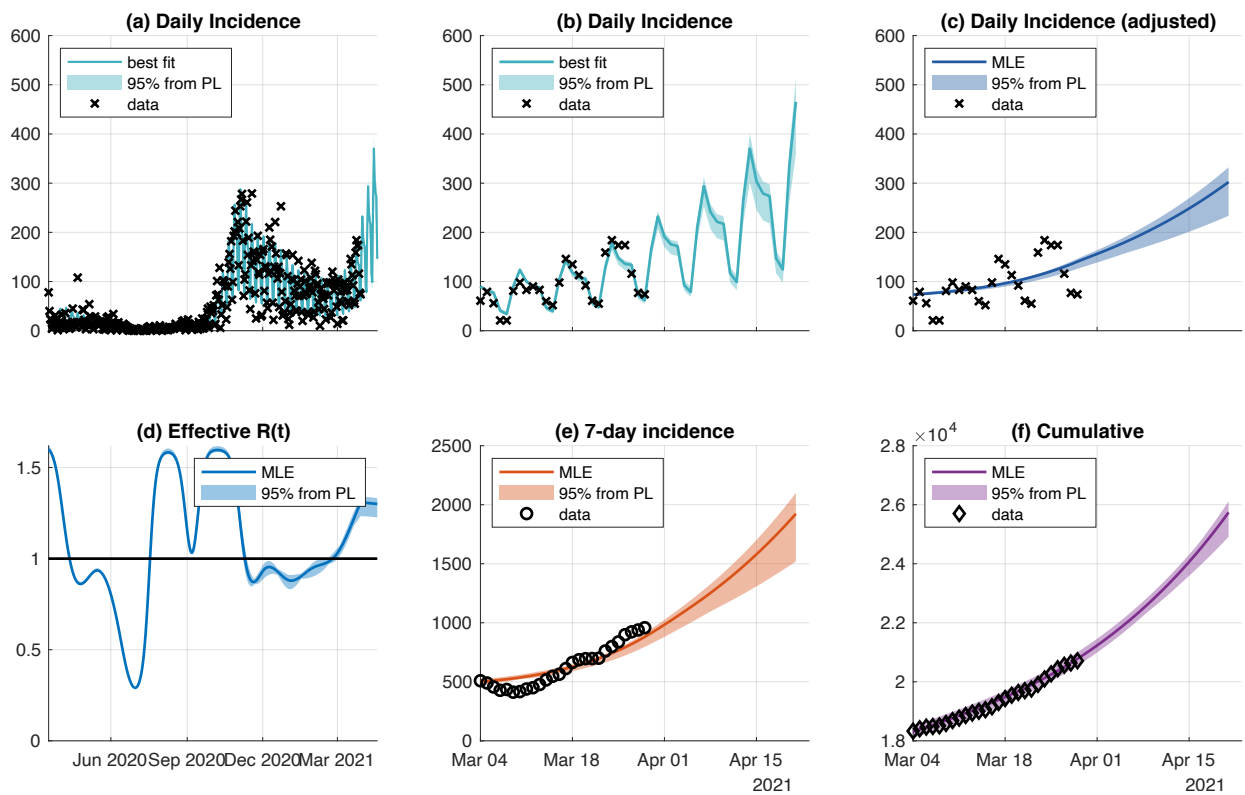

Figure 9: **Result for Bremen**

Corresponding result to figure 2 of the main paper. See page 14 for detailed description.



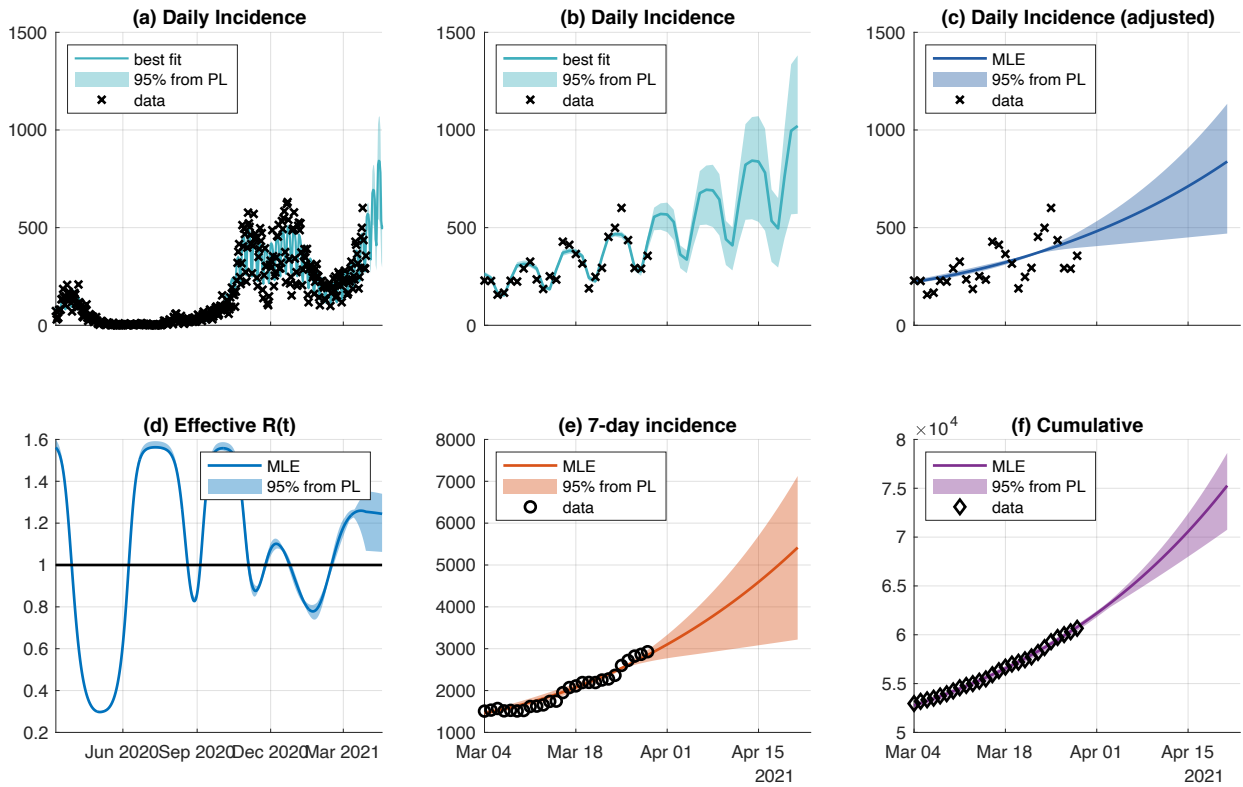

Figure 10: **Result for Hamburg**

Corresponding result to figure 2 of the main paper. See page 14 for detailed description.

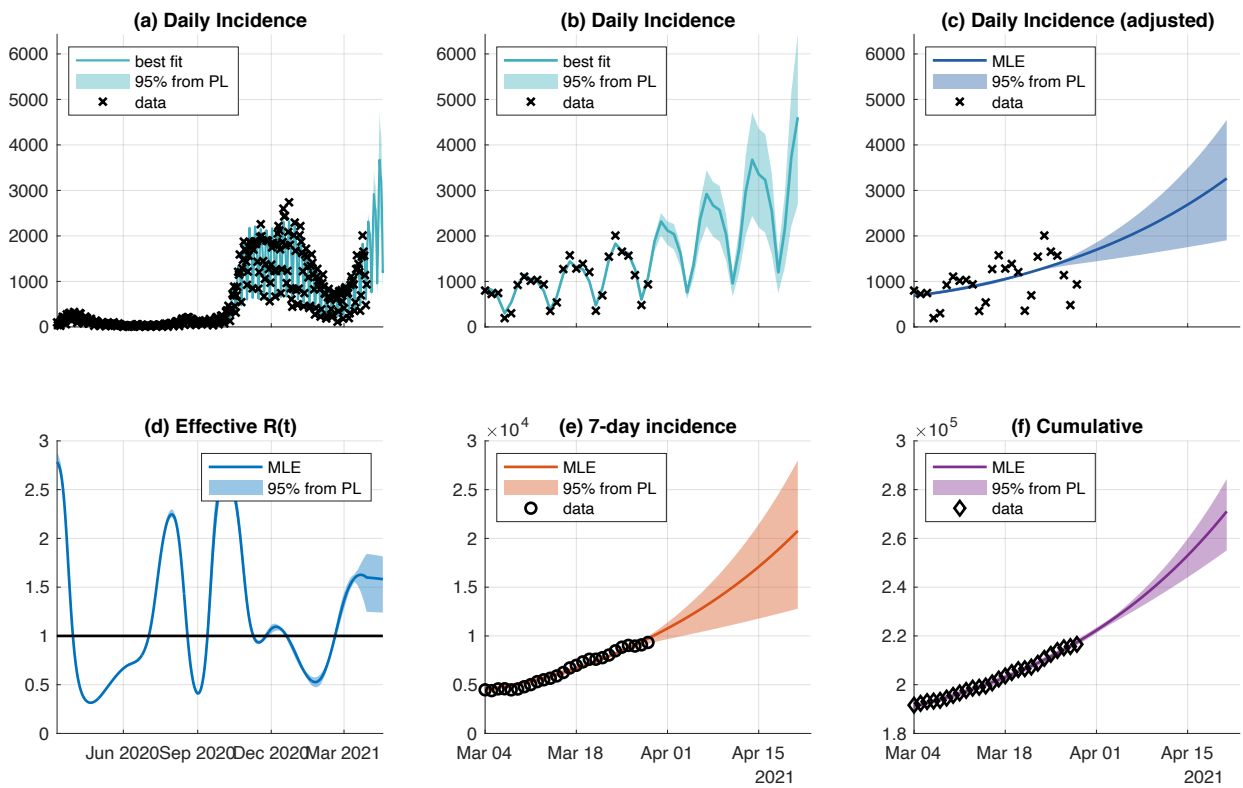

Figure 11: **Result for Hessen**

Corresponding result to figure 2 of the main paper. See page 14 for detailed description.

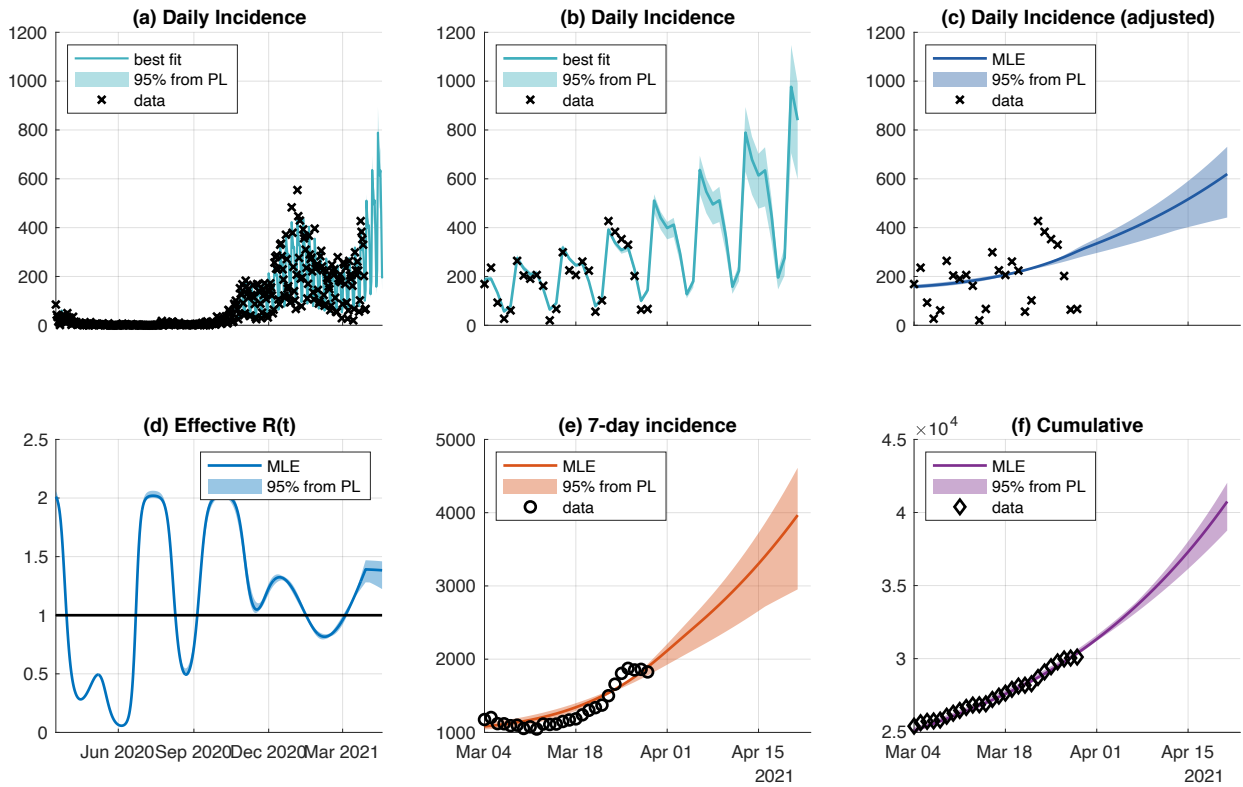

Figure 12: **Result for Mecklenburg-Vorpommern**  
 Corresponding result to figure 2 of the main paper. See page 14 for detailed description.

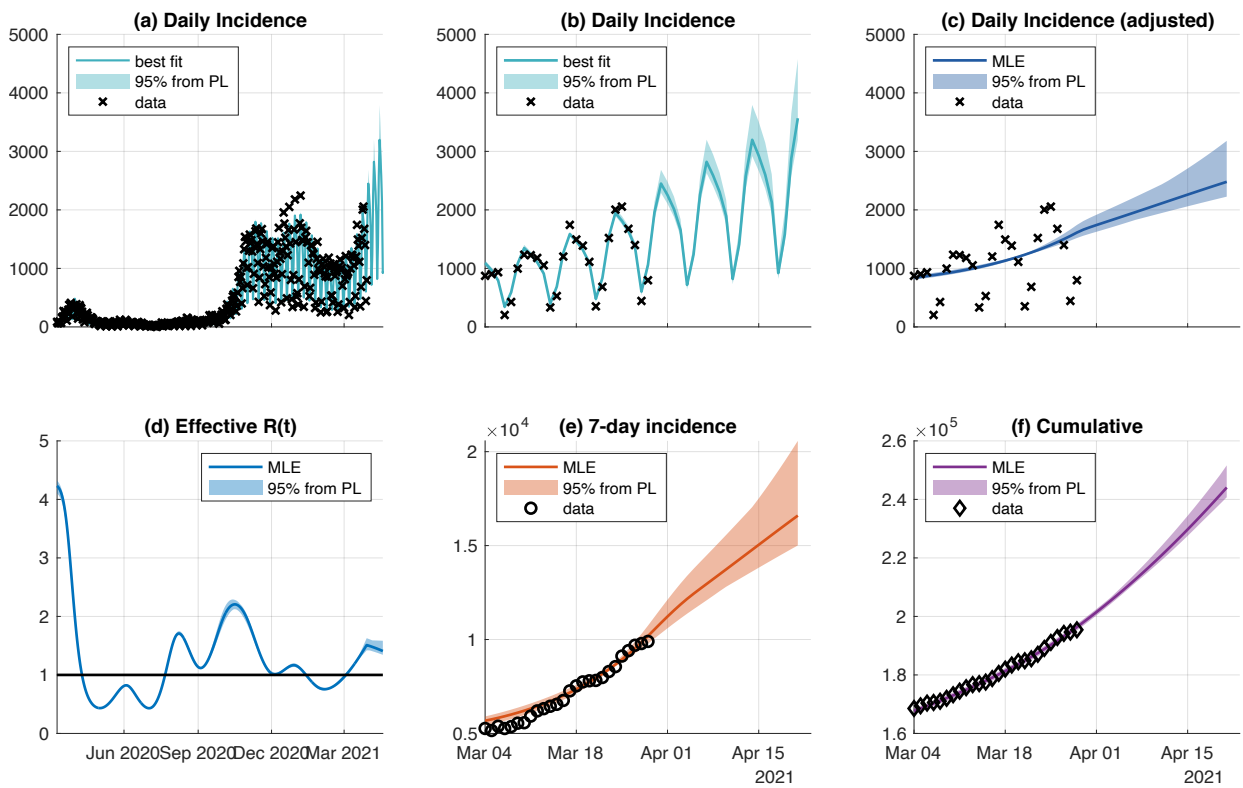

Figure 13: **Result for Niedersachsen**  
 Corresponding result to figure 2 of the main paper. See page 14 for detailed description.

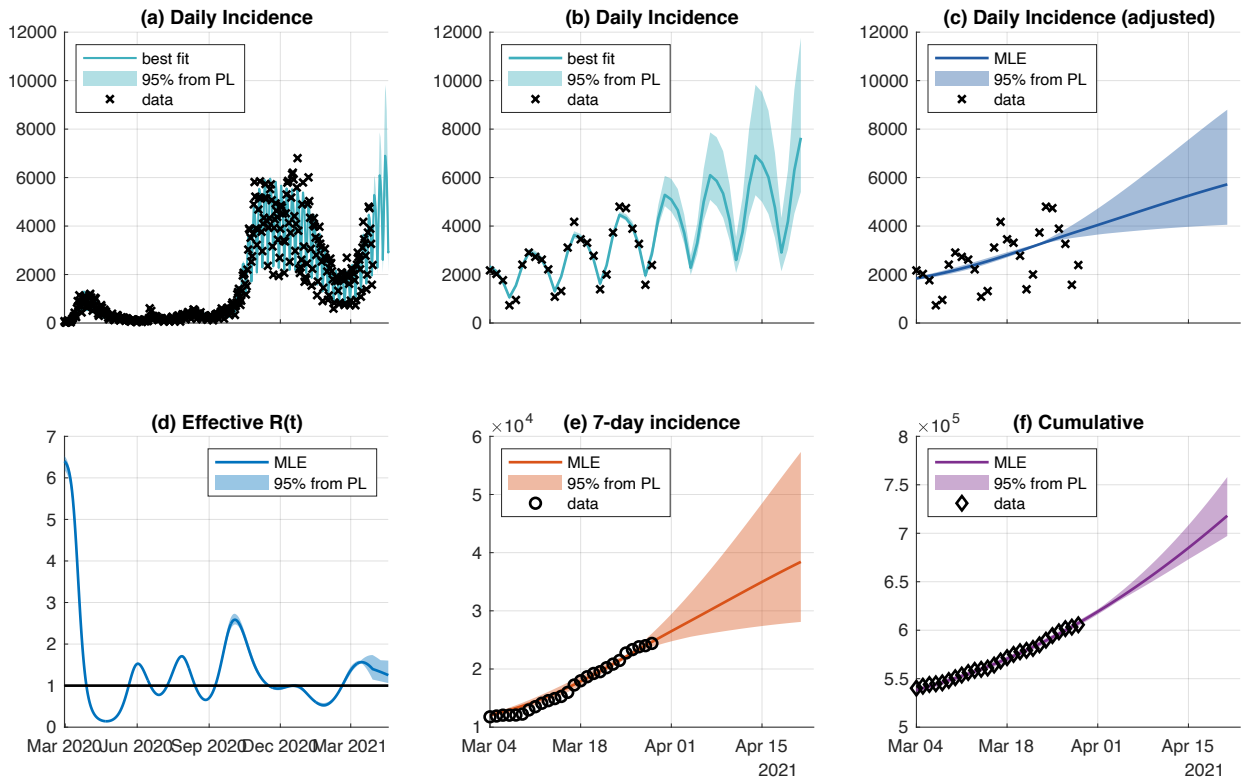

Figure 14: **Result for Nordrhein-Westfalen**

Corresponding result to figure 2 of the main paper. See page 14 for detailed description.

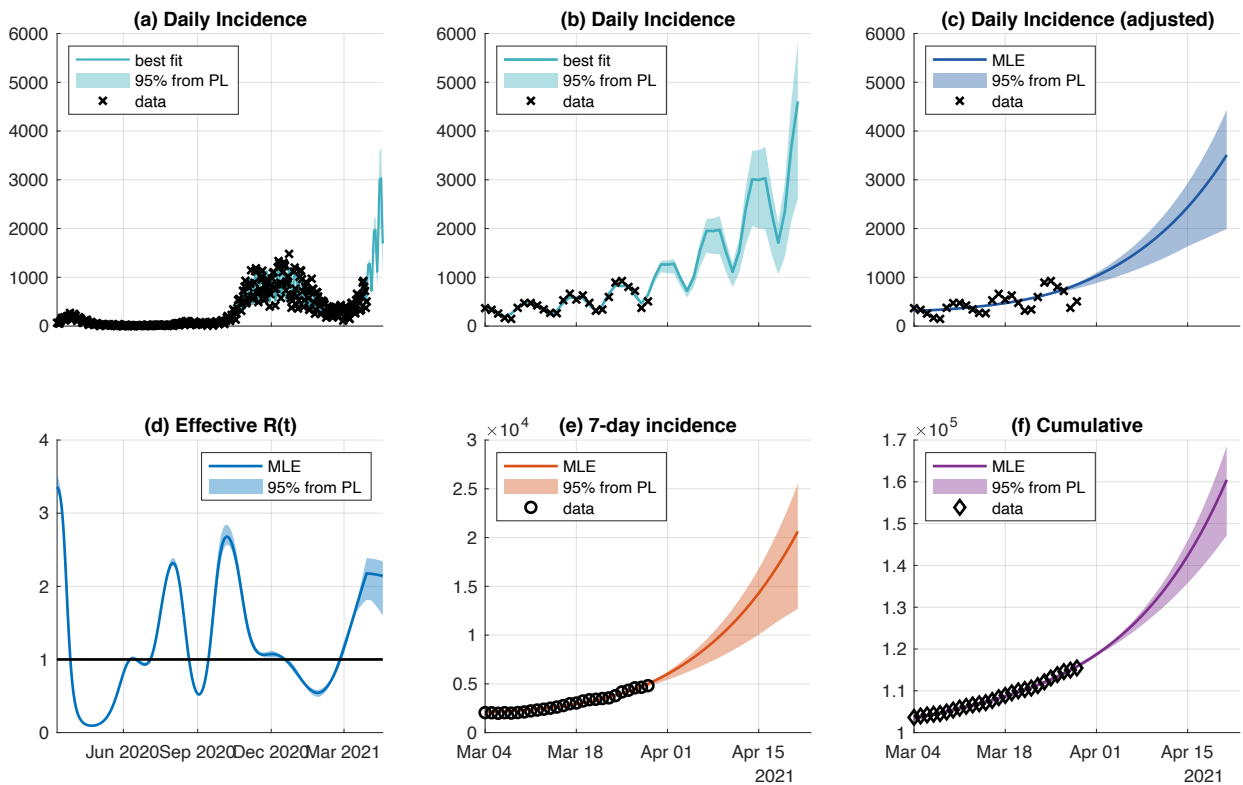

Figure 15: **Result for Rheinland-Pfalz**

Corresponding result to figure 2 of the main paper. See page 14 for detailed description.

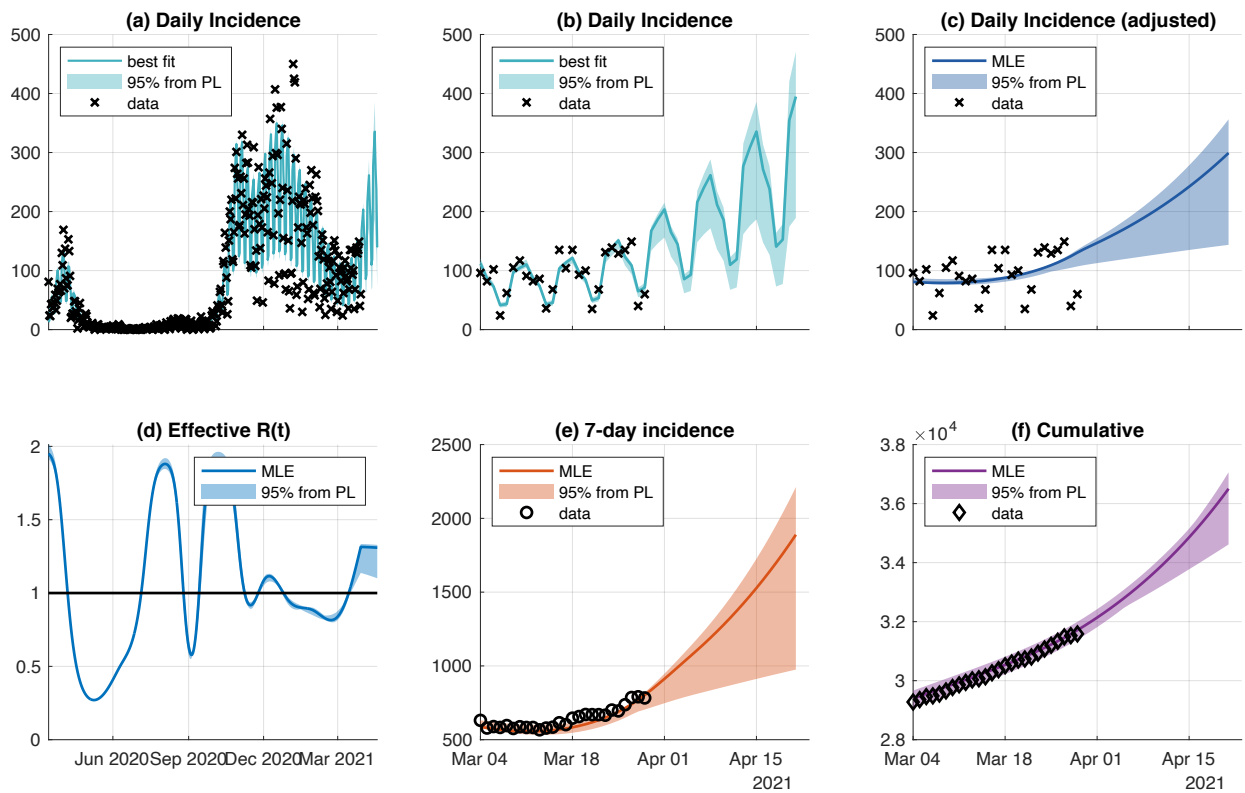

Figure 16: **Result for Saarland**

Corresponding result to figure 2 of the main paper. See page 14 for detailed description.

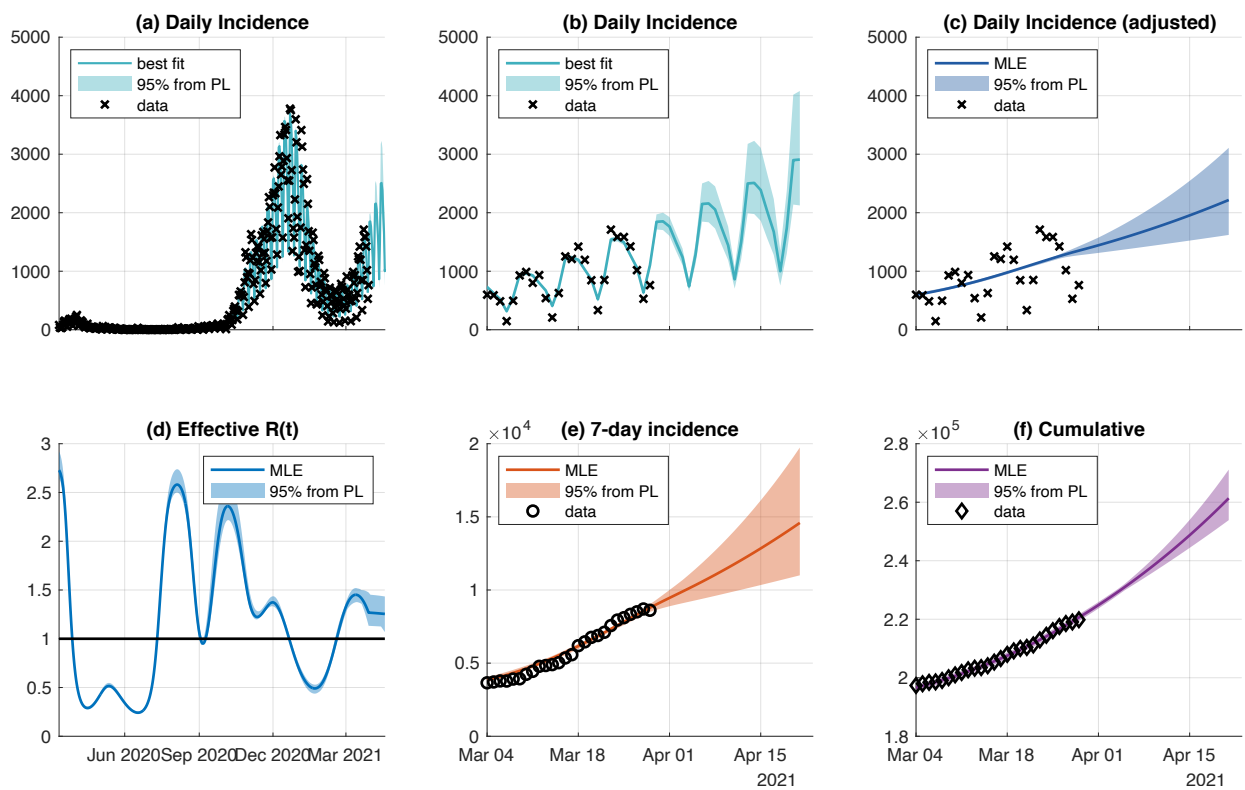

Figure 17: **Result for Sachsen**

Corresponding result to figure 2 of the main paper. See page 14 for detailed description.

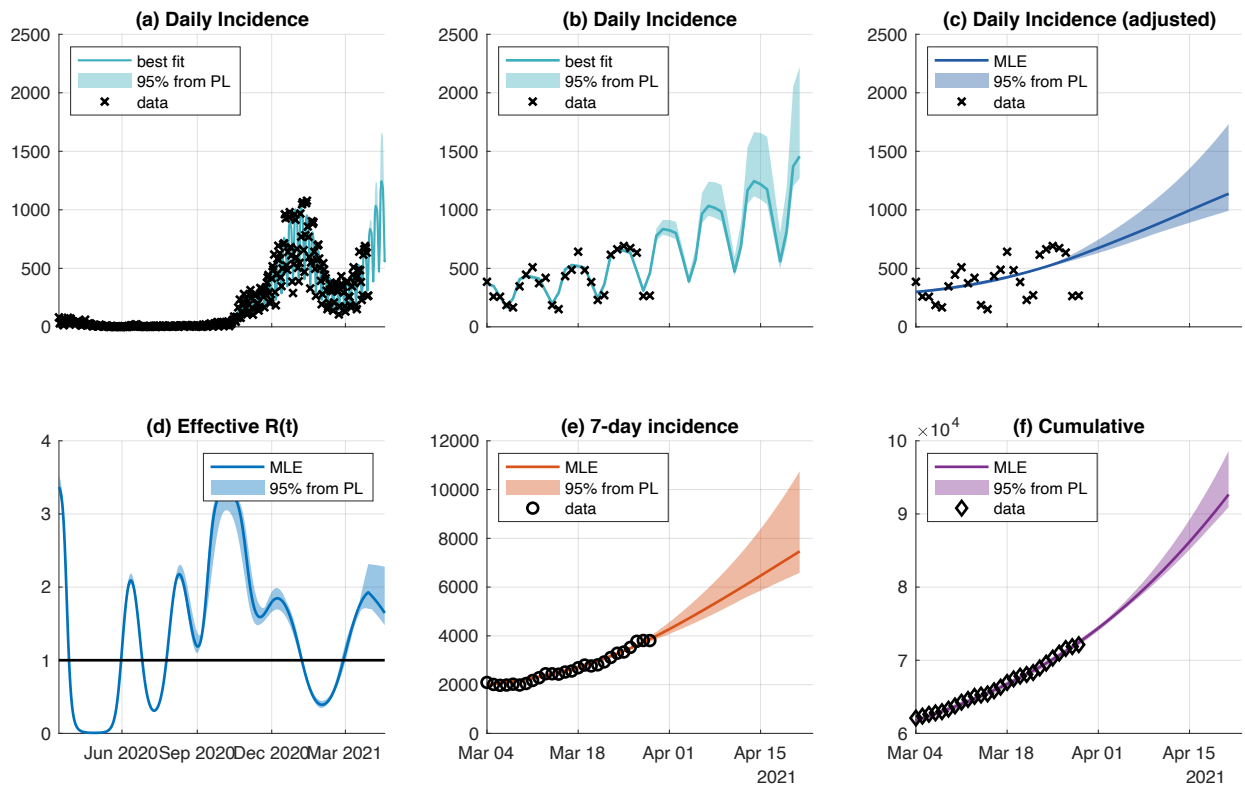

Figure 18: **Result for Sachsen-Anhalt**

Corresponding result to figure 2 of the main paper. See page 14 for detailed description.

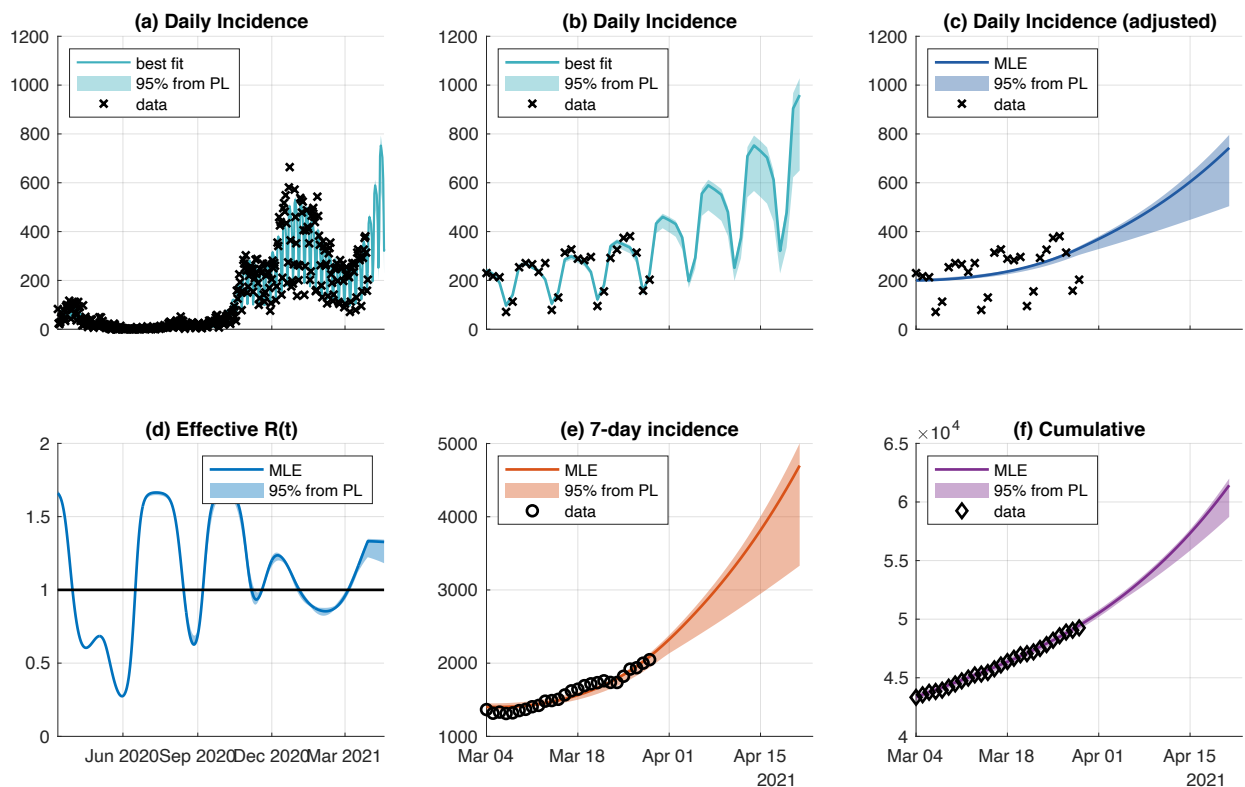

Figure 19: **Result for Schleswig-Holstein**

Corresponding result to figure 2 of the main paper. See page 14 for detailed description.

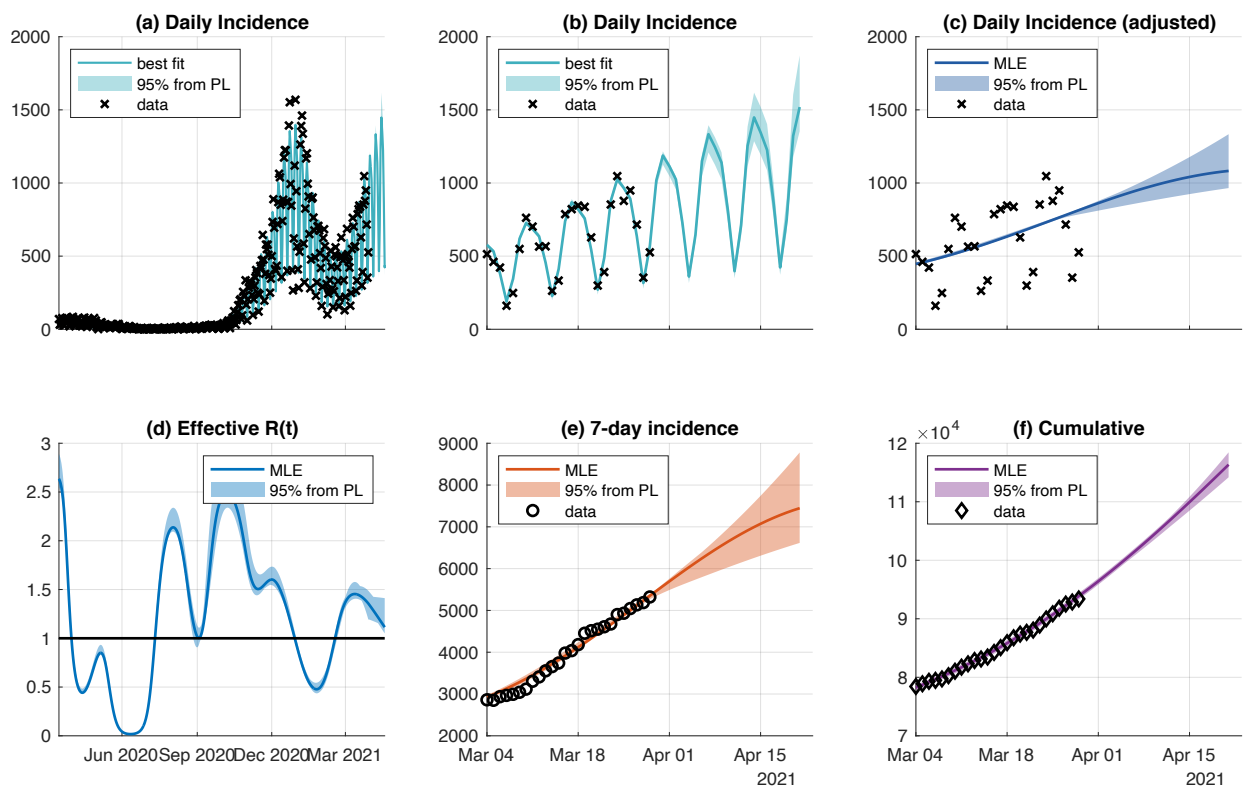

Figure 20: **Result for Thuringen**

Corresponding result to figure 2 of the main paper. See page 14 for detailed description.

## 6.2 Weekly factor

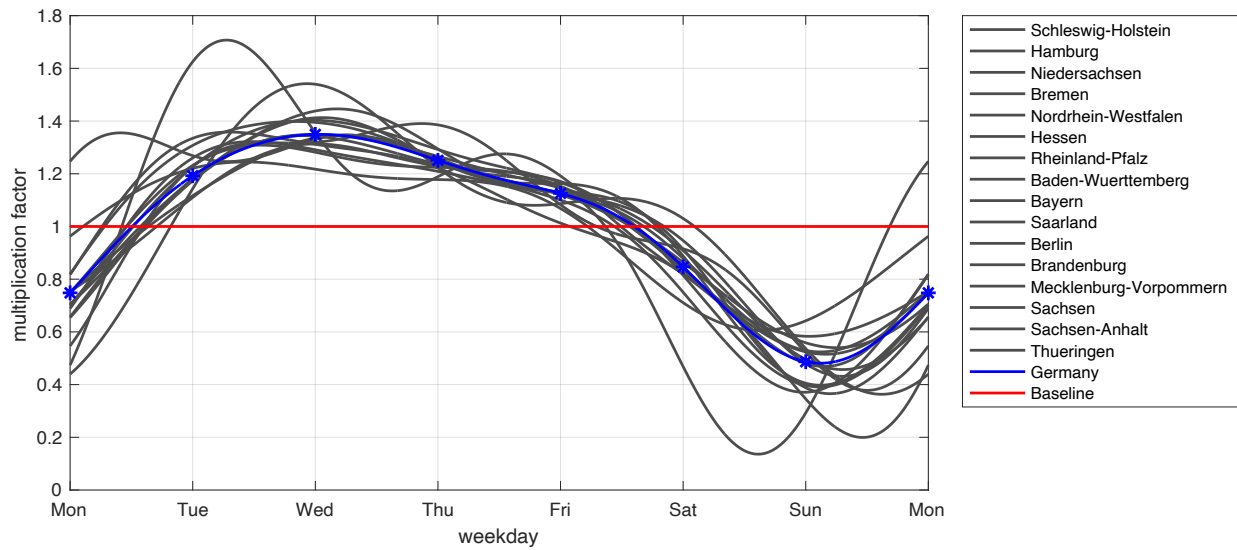

Figure 21: **Modulation factor is dependent on federal state**

Due to the parametrisation via a Fourier series, the weekday modulation function is a periodic function with periodicity 7. Estimates for all federal states (grey lines) and Germany (blue line) are computed independent of each other. Albeit continuous functions are estimated, only the function evaluation at seven discrete time points enter the observation function (blue asterisks). The baseline value of 1 (red line) indicates no effect by the weekday. Also, compare figure 1 of this Supplement where the respective data features of Germany are visualised.

## 7 Results for all regions and counties: Landkreise

For all counties, the federal state's trajectory is scaled down and uncertainties for scaling down are computed. Due to computing power and time limitations as results should be computed with the latest data, this method was chosen and turned out to be feasible for daily computations of results. In the following figures we give an example of how results for the county level look like for the relevant time frame which is the most recent couple of months and the prediction for the upcoming weeks. For clarity, we display the trajectories without weekly modulation and after merging the two different approaches described in the main paper.



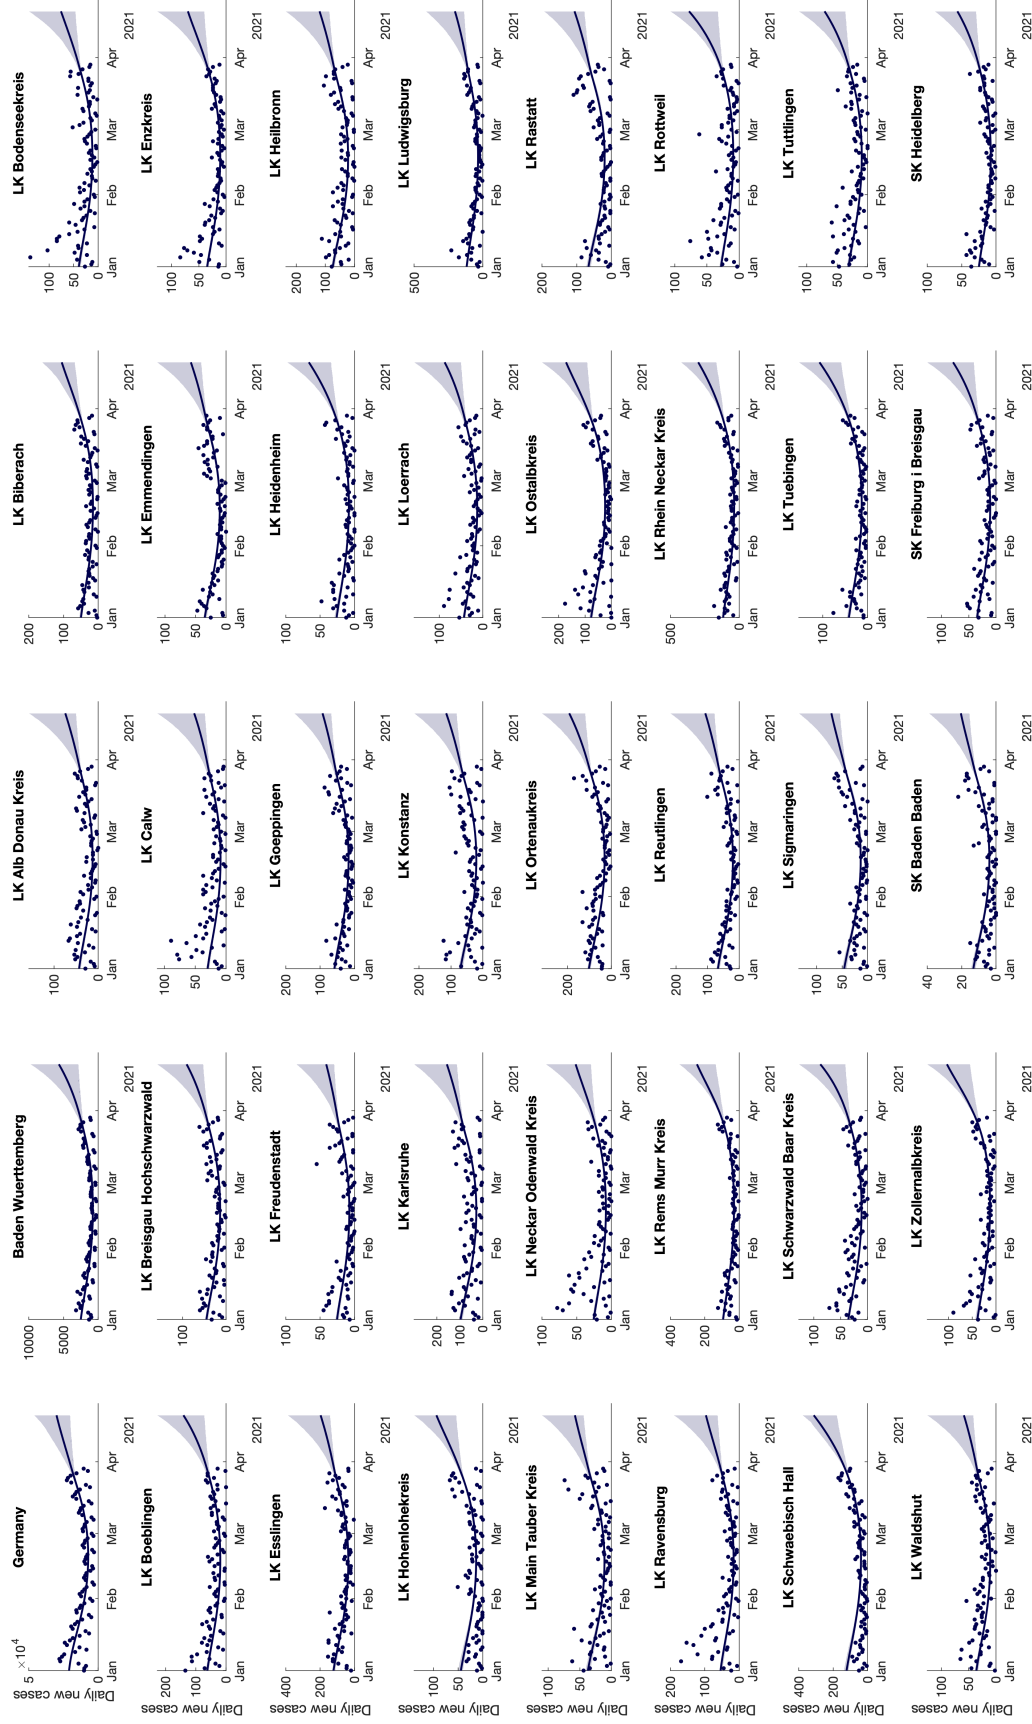

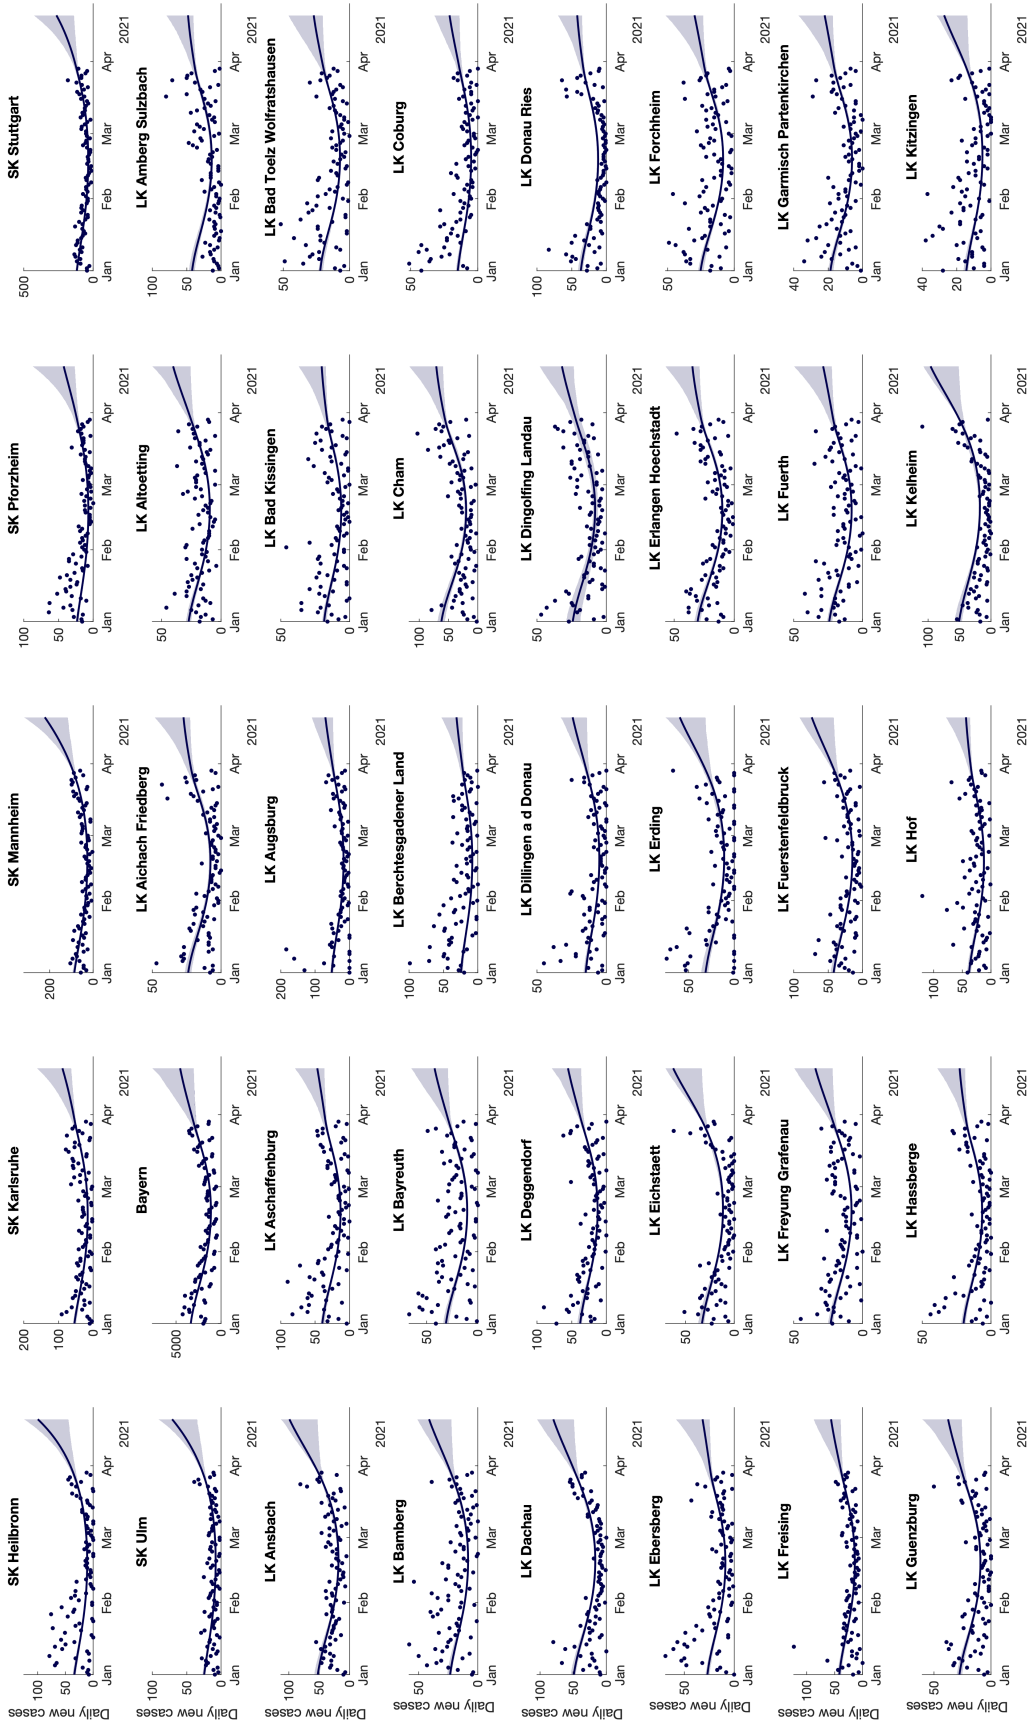

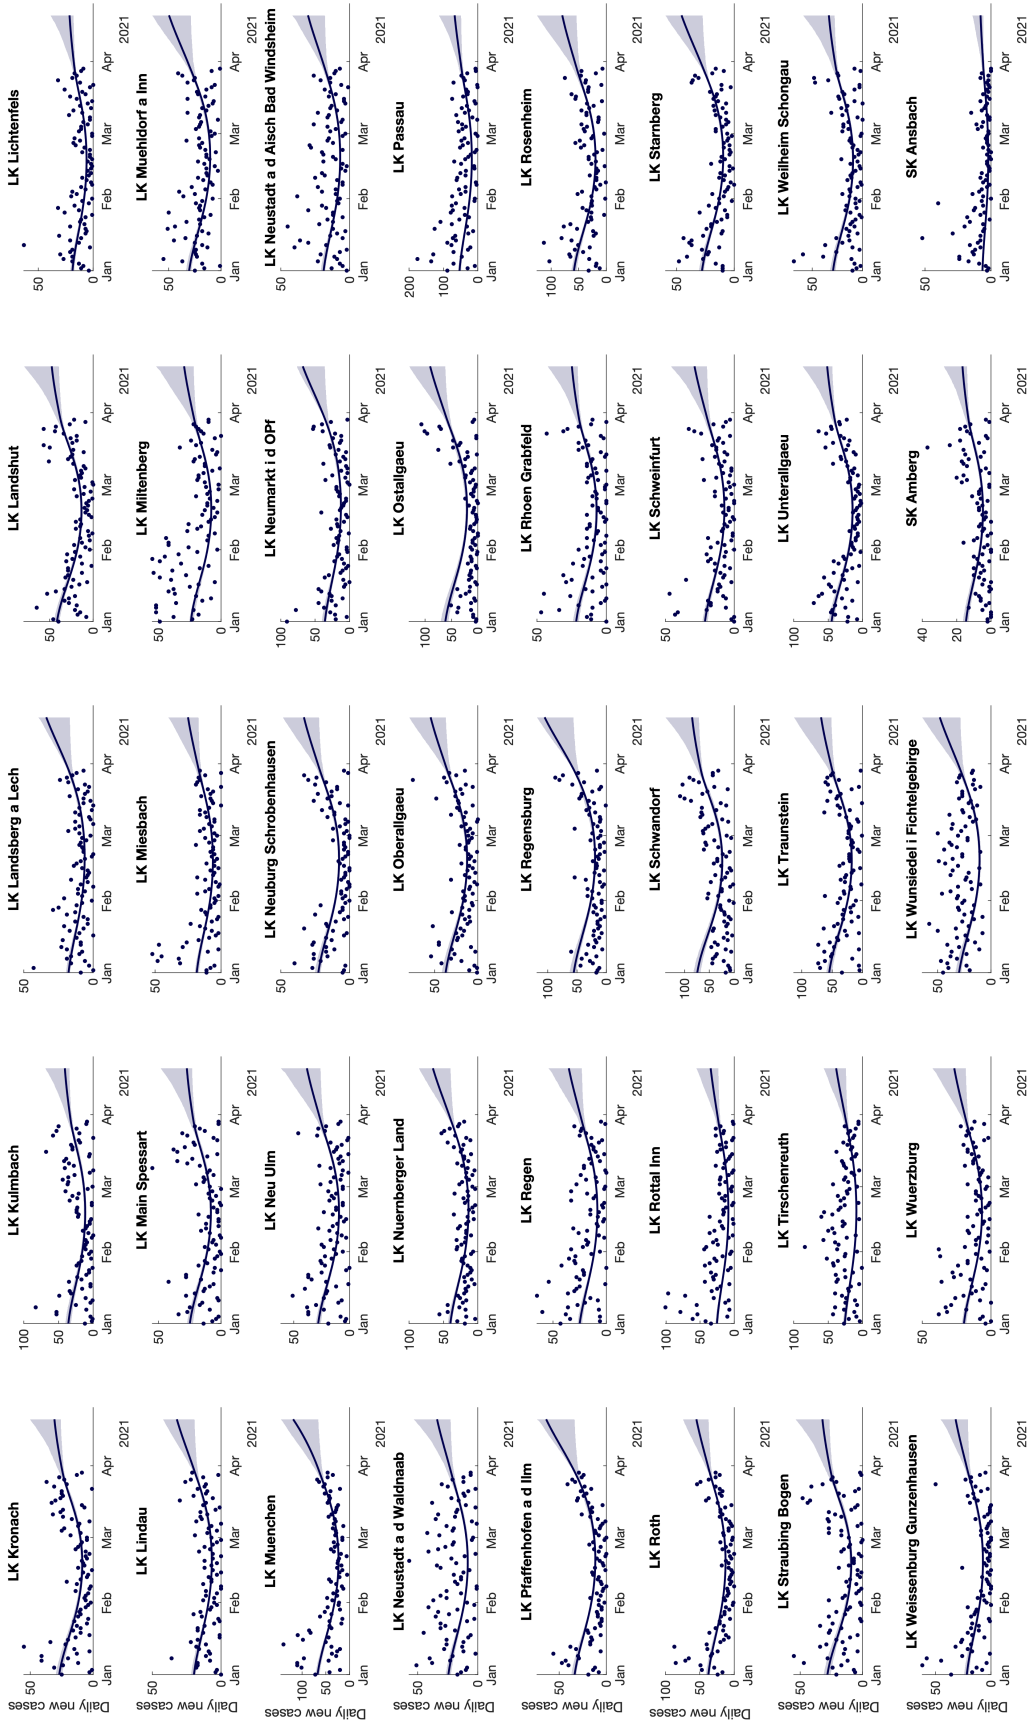

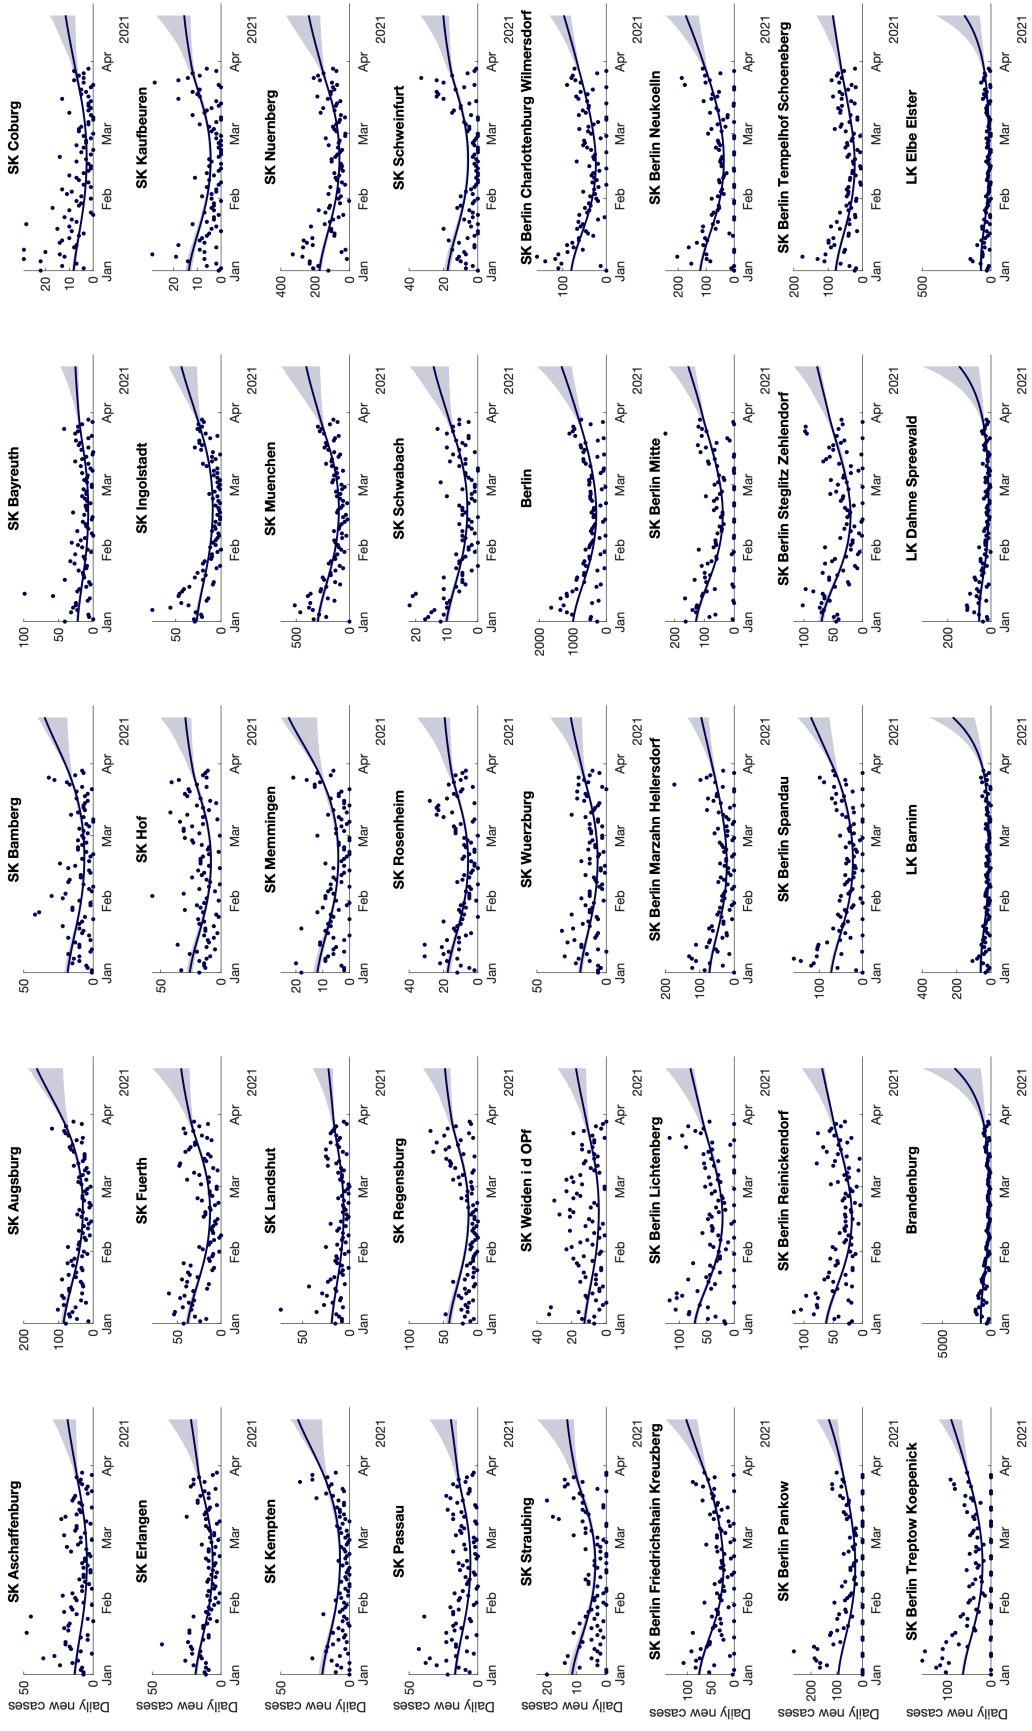

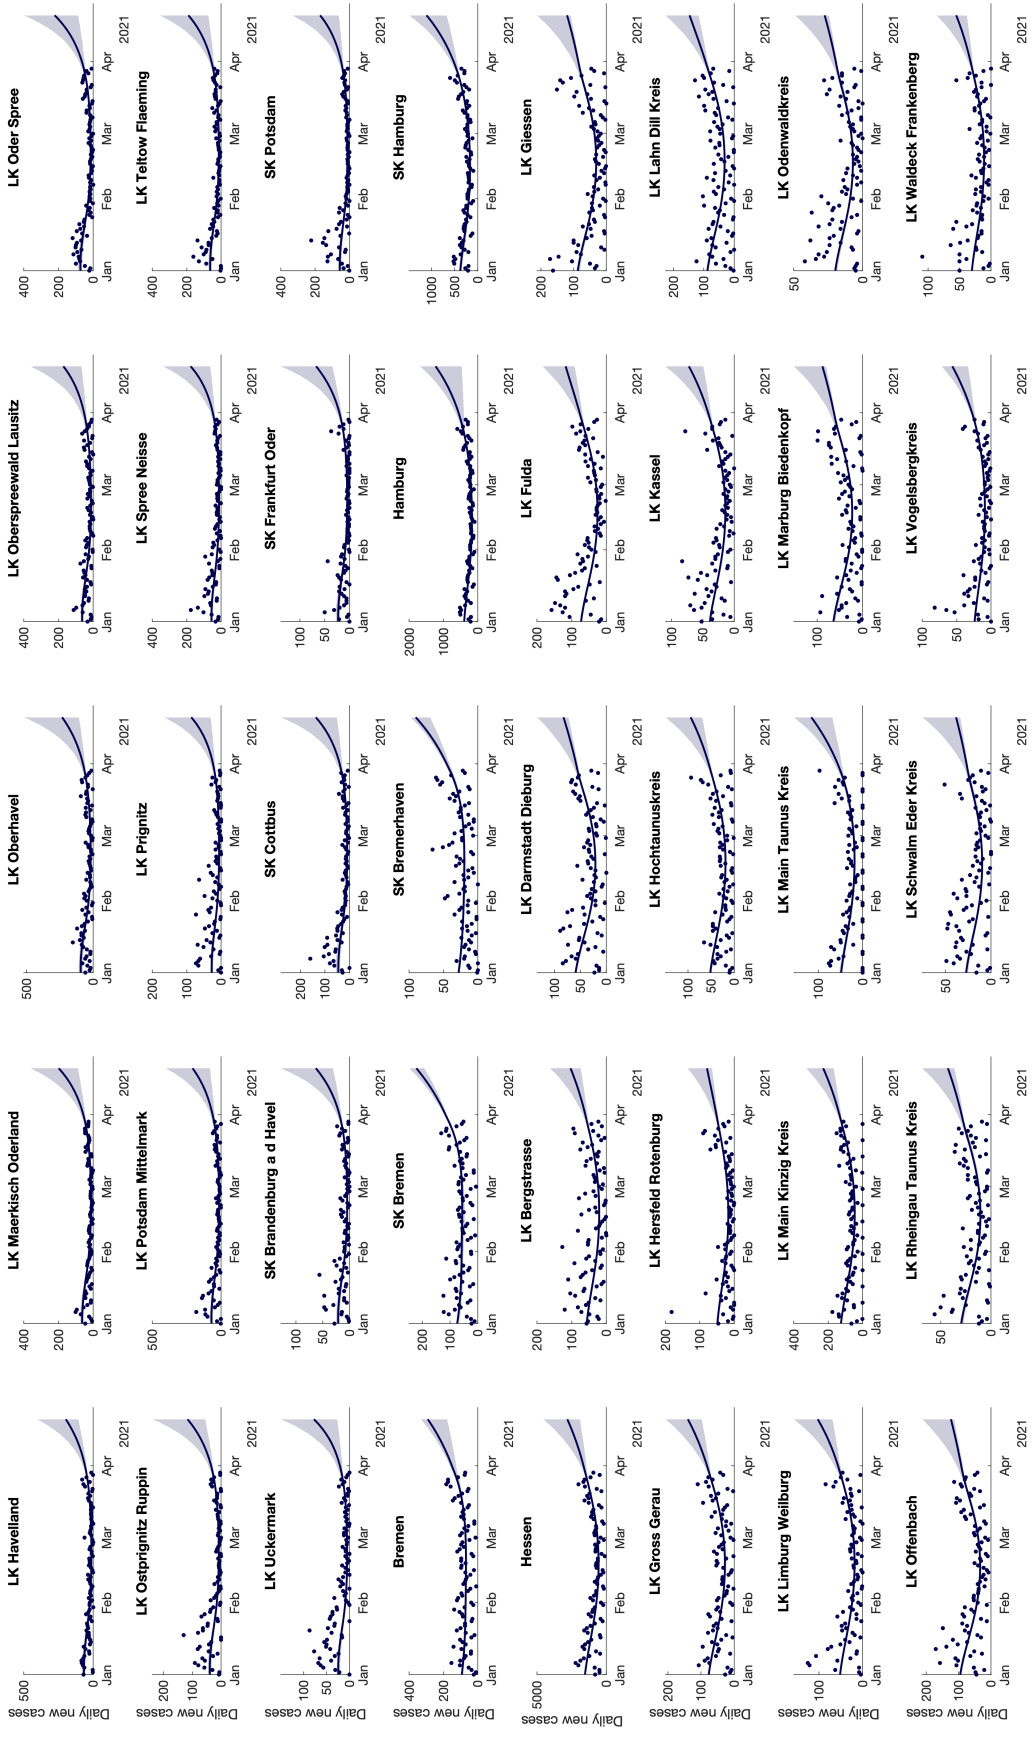

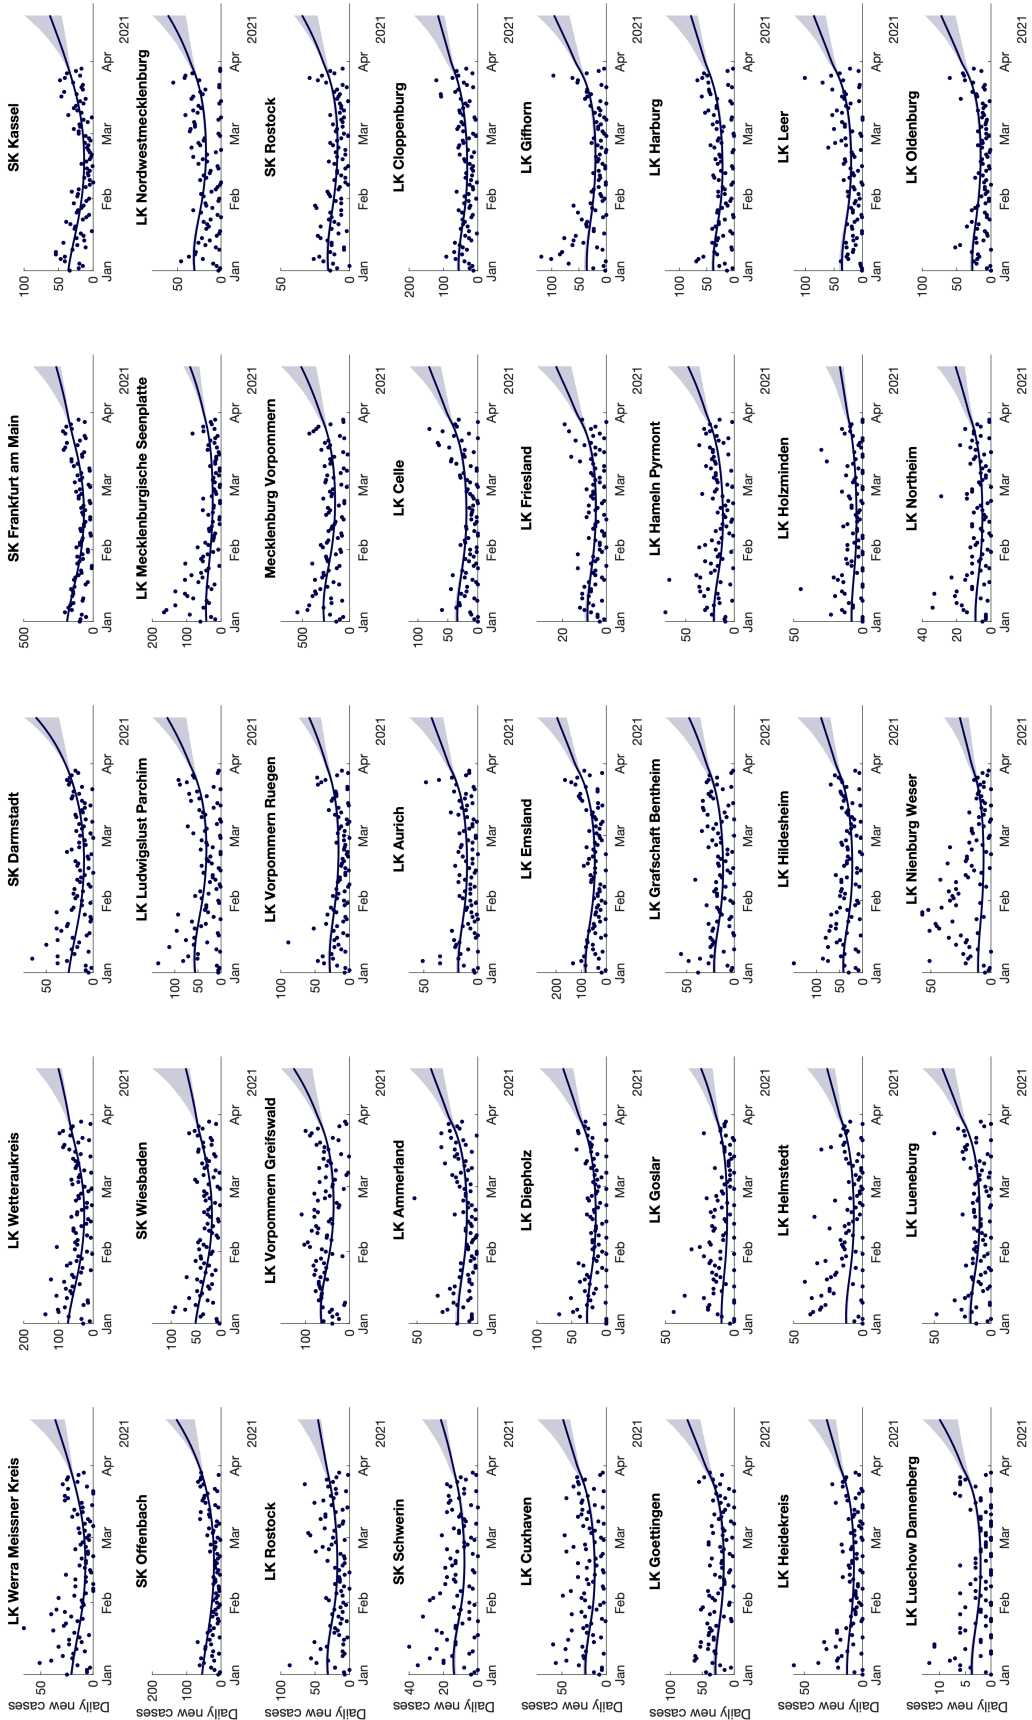

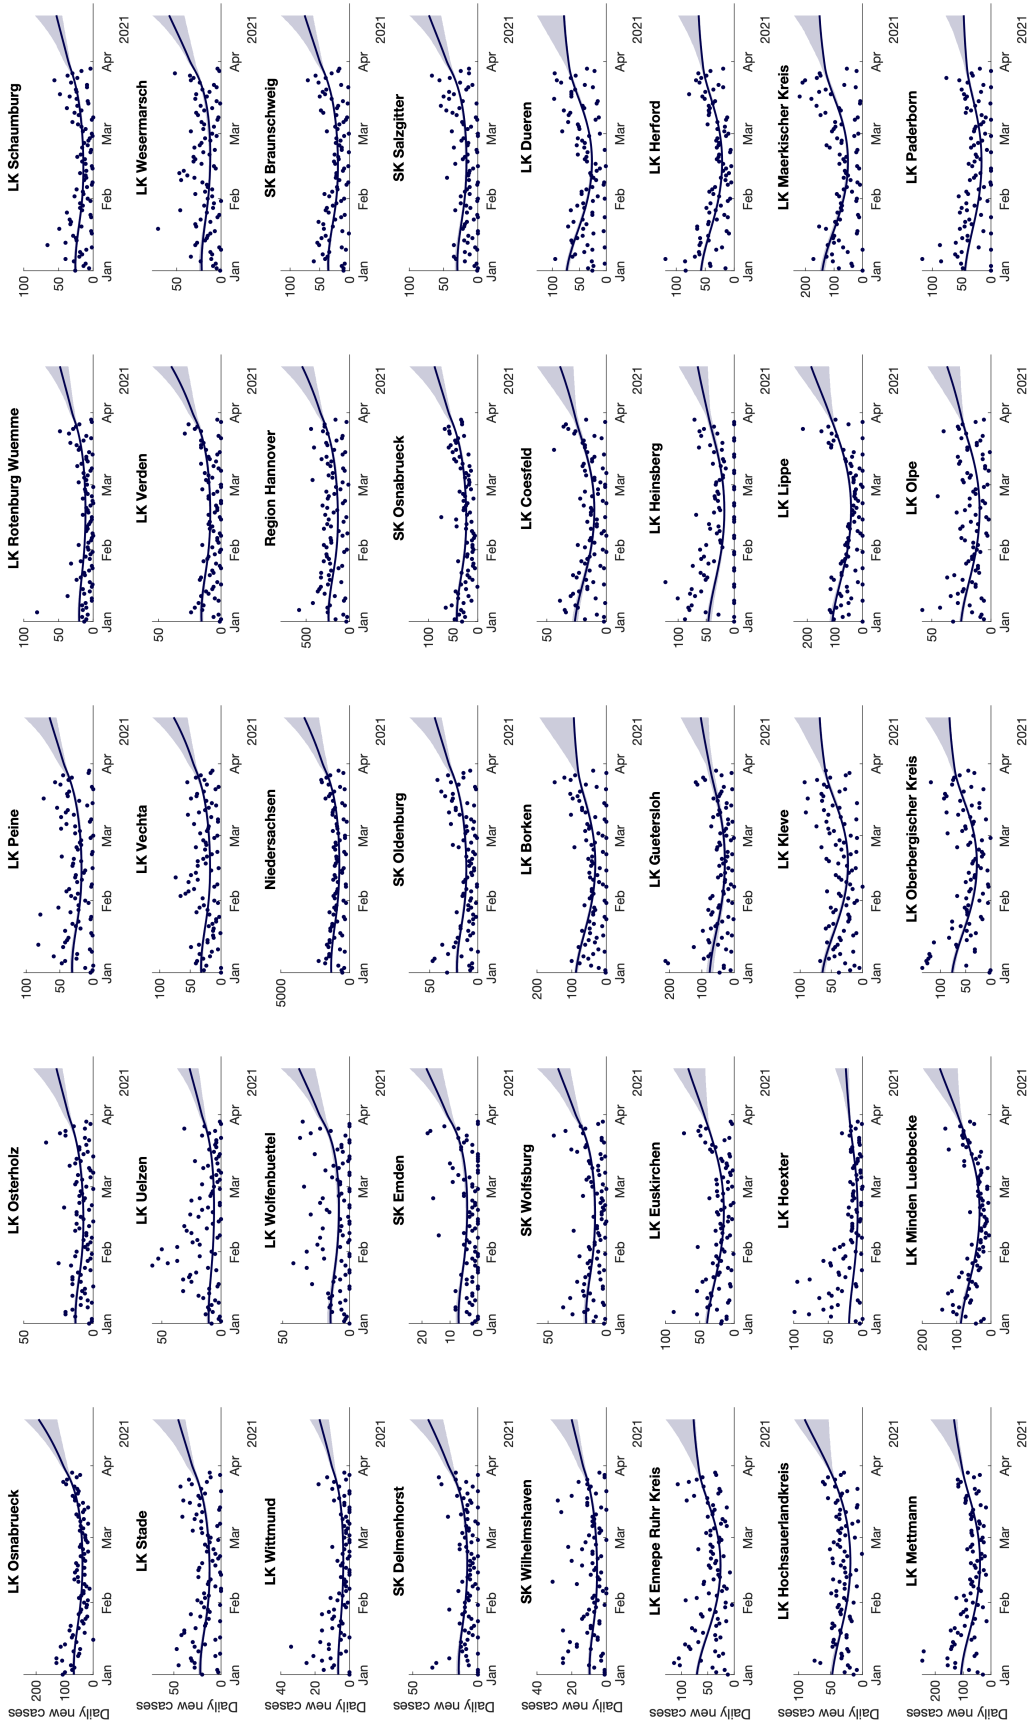

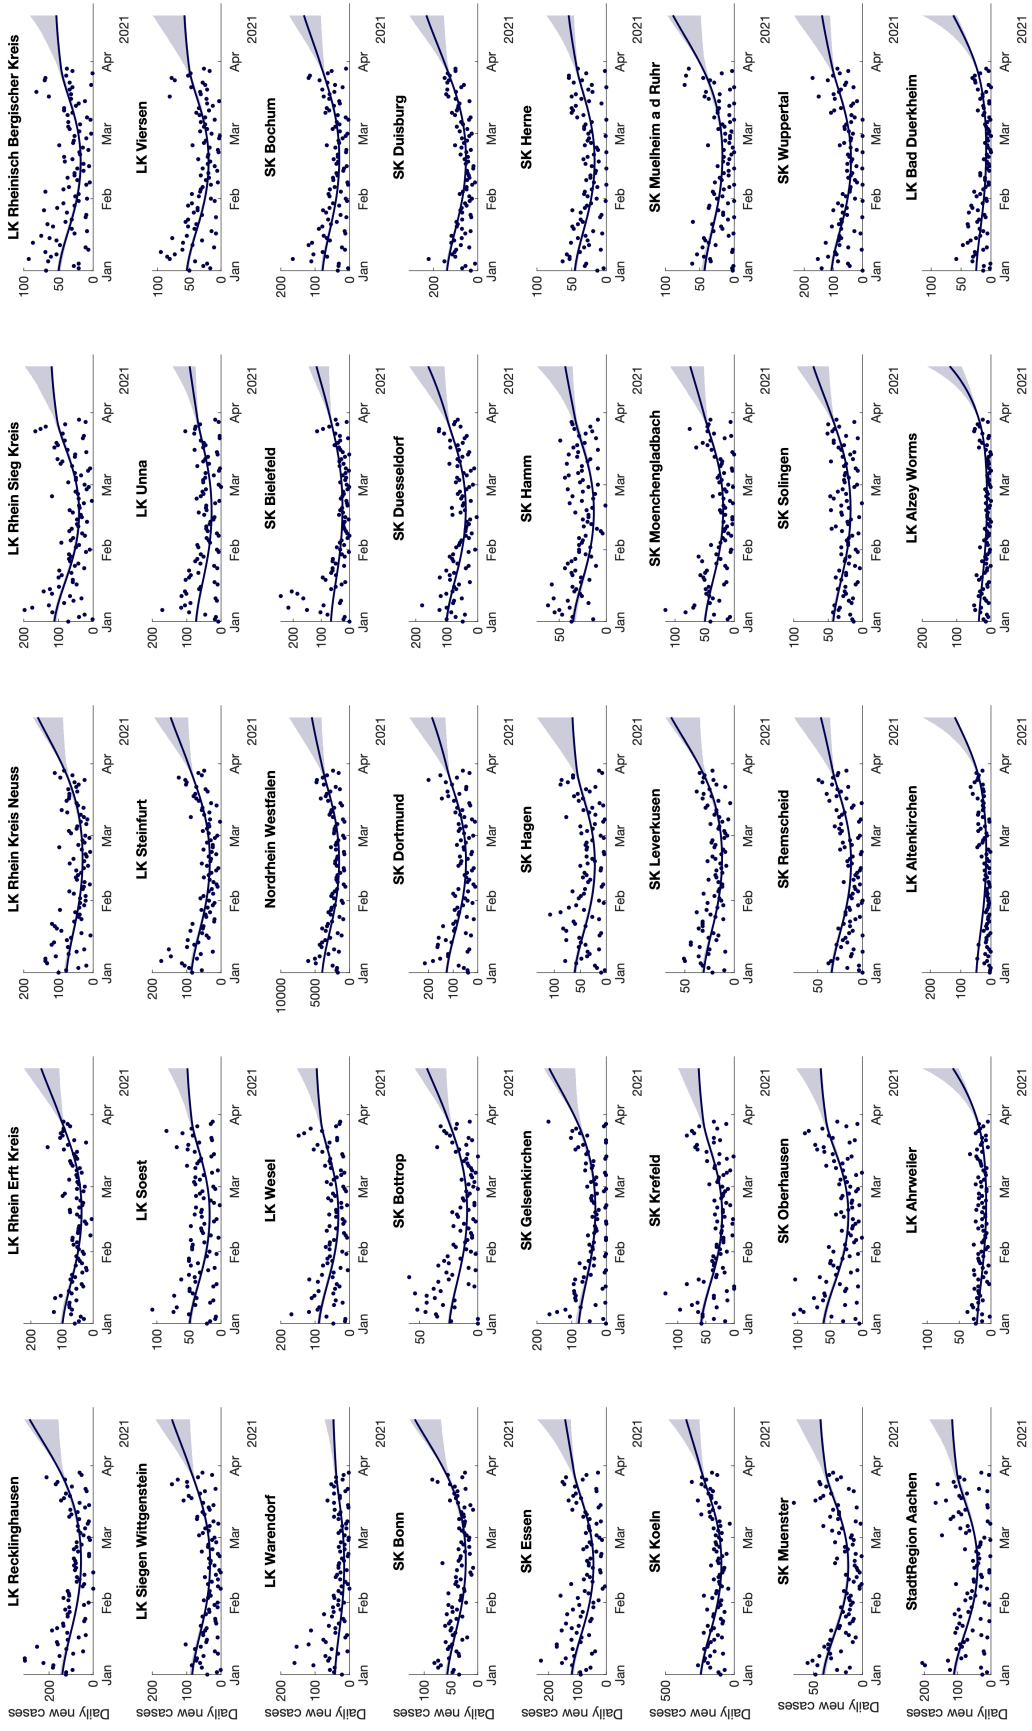



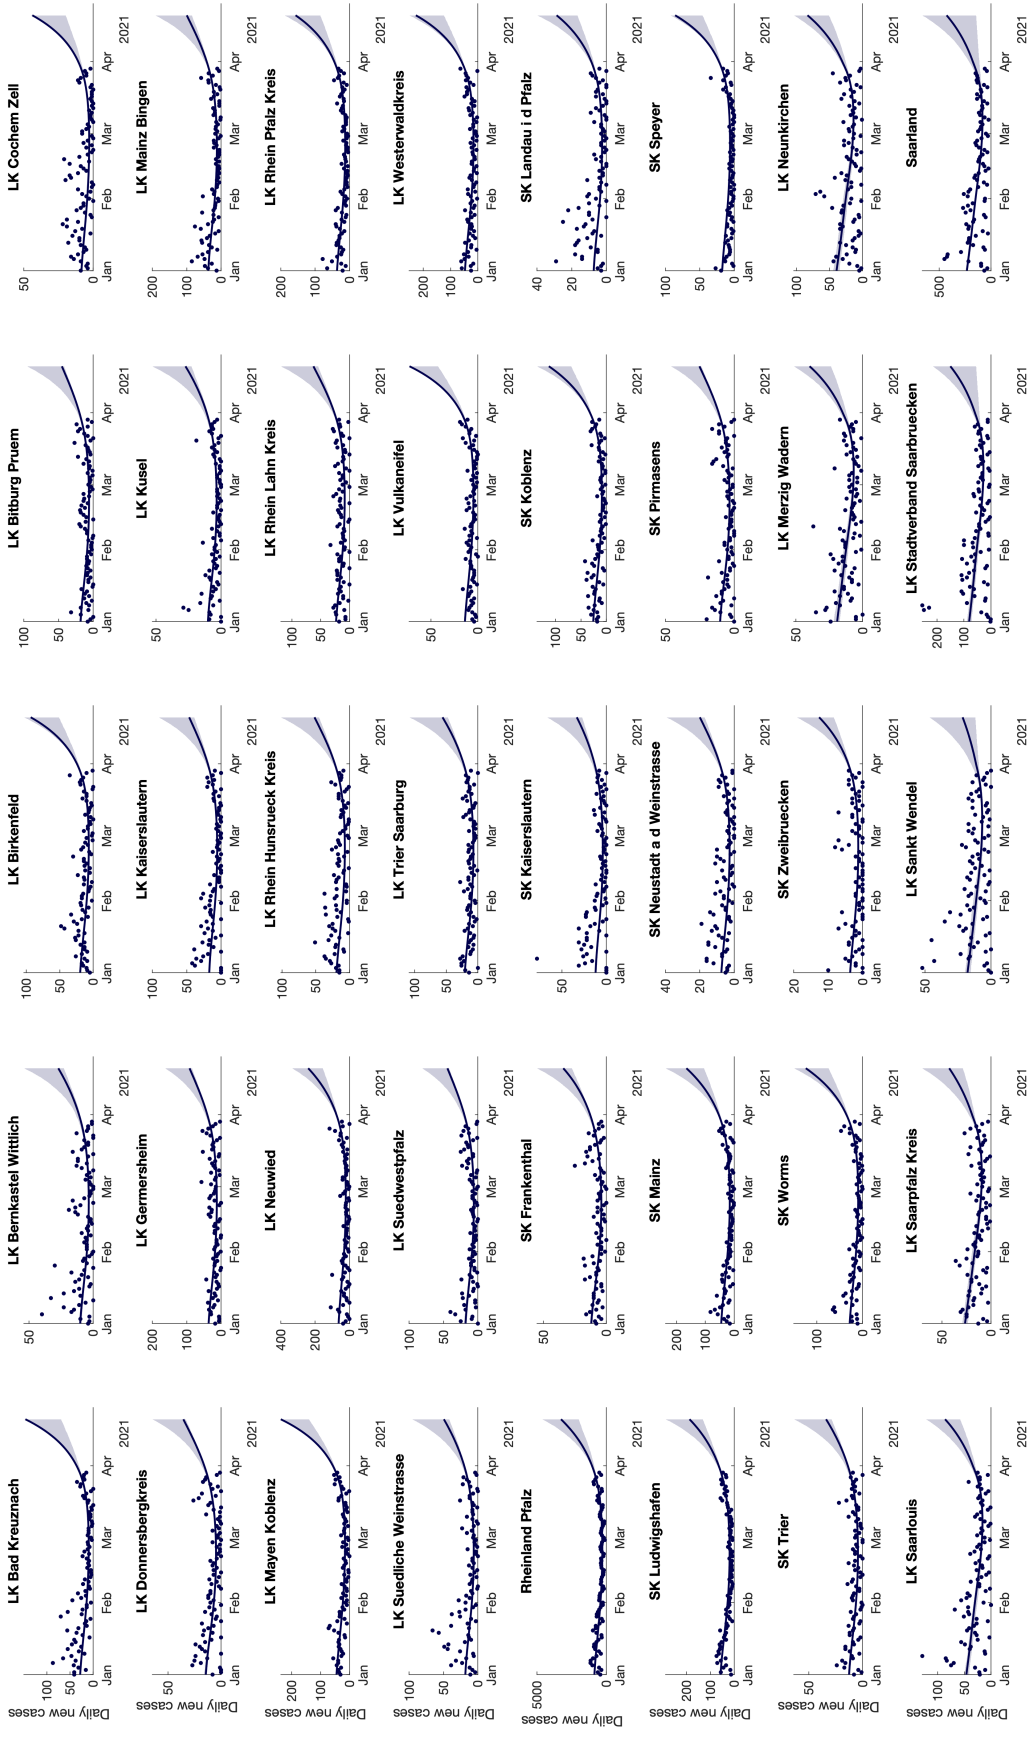

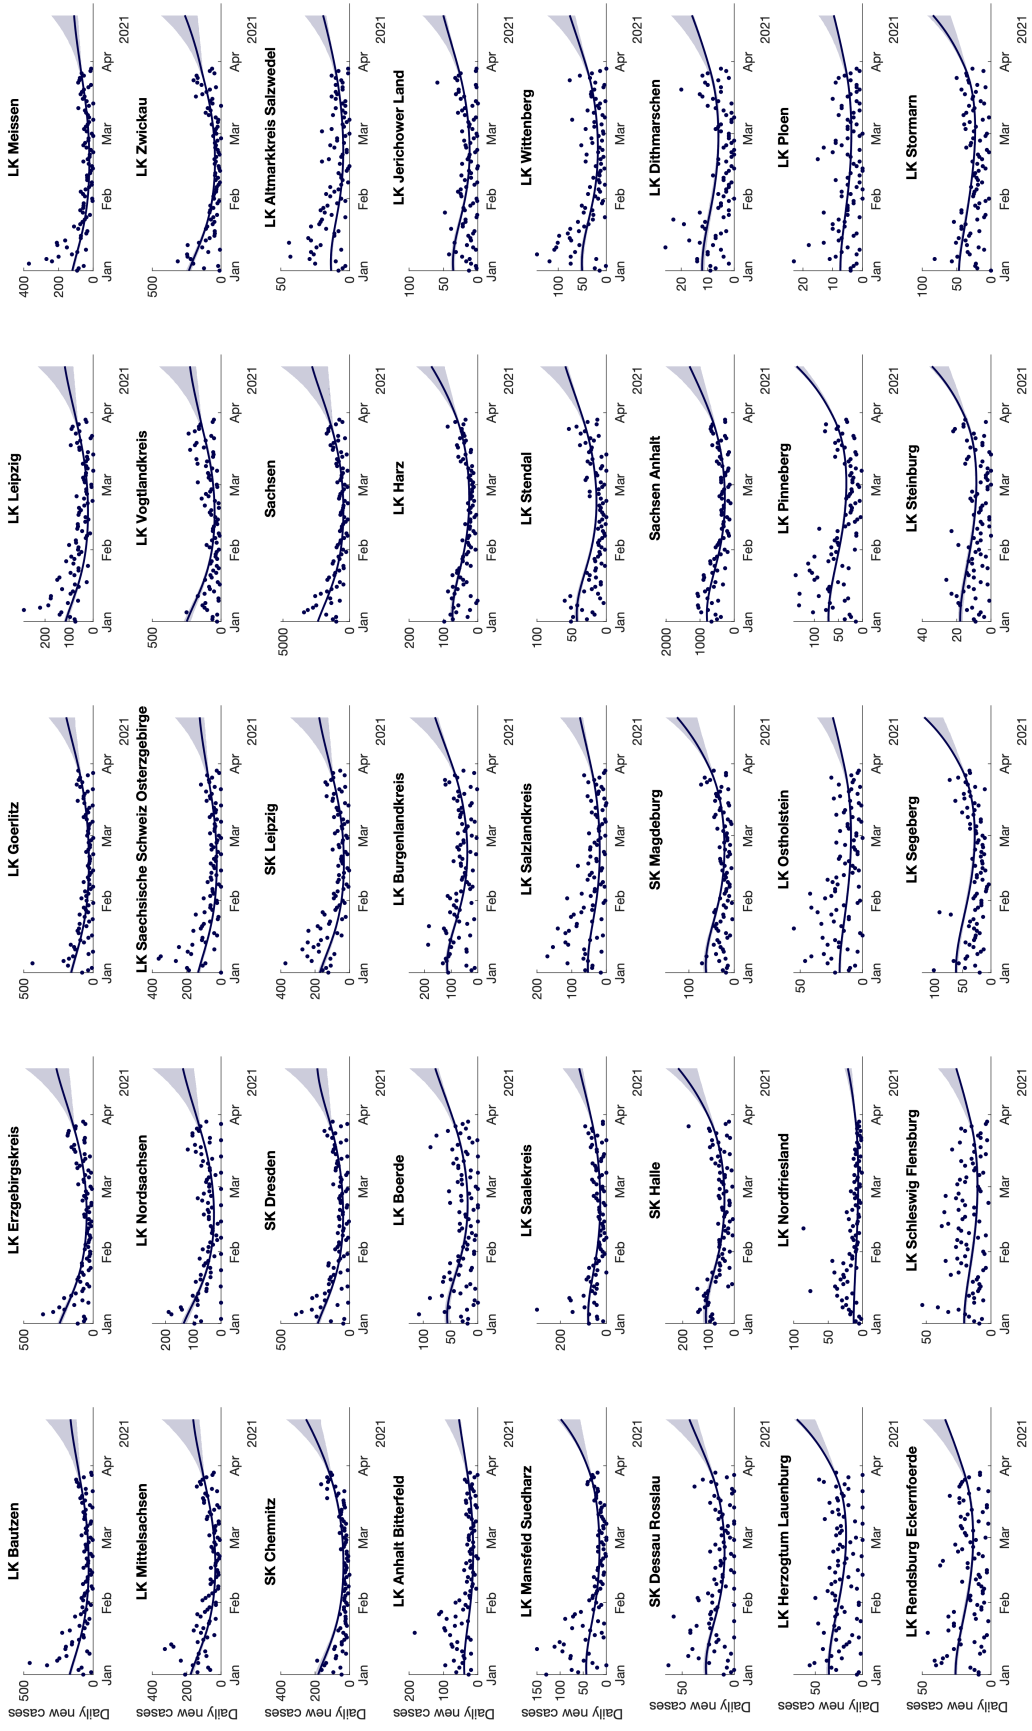

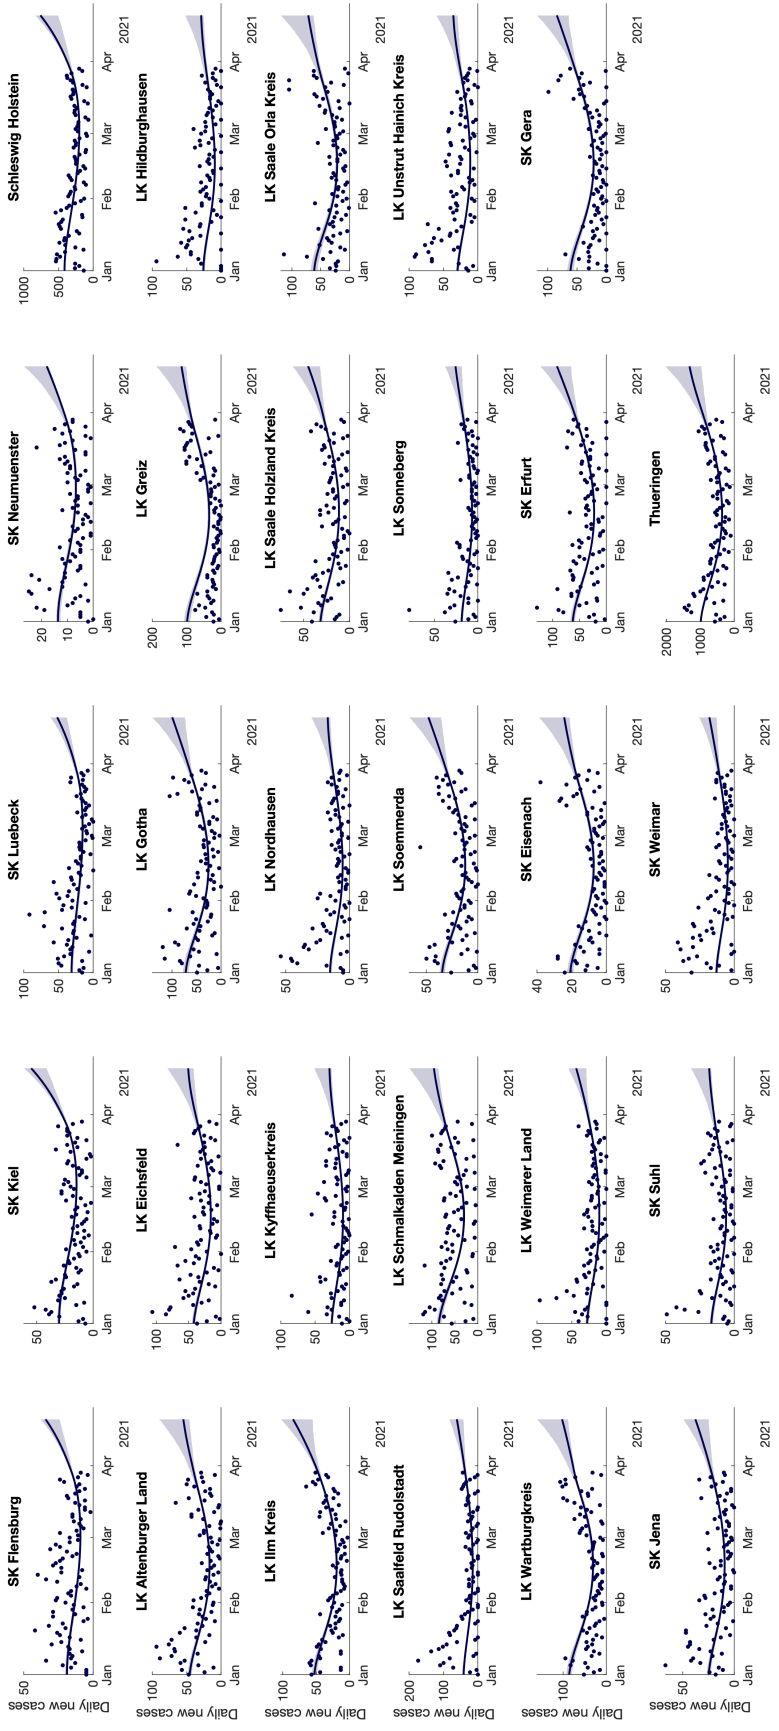

Supplement: 12874_2022_1579_MOESM1_ESM.pdf [file 12874_2022_1579_MOESM1_ESM.pdf]
